# Supplementary material for: The Rise and Fall of Billionaire siRNAs during Reproductive Development in Rice
Source: MDPI journal article supplement (doi:10.3390/plants11151957), 2022-07-28
Supplement: s1 [file s1]

**Table S1 Bill-siRNA clusters list.**

**Bill-siRNA clusters in Nipponbare seedling**

| Region                  | Length | seedling-R1_reads | seedling-R2_reads | seedling-R1_RPTM | seedling-R2_RPTM |
|-------------------------|--------|-------------------|-------------------|------------------|------------------|
| Chr10:4833386-4833508   | 123    | 4809              | 3569              | 2675.71          | 2208.25          |
| Chr10:10320598-10320961 | 364    | 15165             | 10986             | 8437.76          | 6797.37          |
| Chr10:20680292-20680594 | 303    | 4078              | 5602              | 2268.99          | 3466.13          |
| Chr12:9355709-9356941   | 1233   | 10905             | 9637              | 6067.51          | 5962.7           |
| Chr2:1553148-1553253    | 106    | 31543             | 24242             | 17550.4          | 14999.3          |
| Chr2:8522078-8522114    | 37     | 13082             | 7402              | 7278.79          | 4579.84          |
| Chr2:8525226-8525258    | 33     | 9366              | 7386              | 5211.22          | 4569.94          |
| Chr2:9901657-9902569    | 913    | 5514              | 4584              | 3067.97          | 2836.26          |
| Chr3:30515072-30515183  | 112    | 3514              | 5180              | 1955.18          | 3205.02          |
| Chr4:19715084-19715249  | 166    | 7751              | 7679              | 4312.63          | 4751.23          |
| Chr4:19715478-19715718  | 241    | 11876             | 6365              | 6607.77          | 3938.22          |
| Chr5:2810218-2810607    | 390    | 5254              | 4882              | 2923.31          | 3020.64          |
| Chr5:3660751-3661764    | 1014   | 3804              | 3090              | 2116.53          | 1911.88          |
| Chr6:13330447-13330641  | 195    | 7692              | 5974              | 4279.81          | 3696.29          |
| Chr6:21165722-21165845  | 124    | 4154              | 5162              | 2311.27          | 3193.88          |
| Chr7:136323-139659      | 3337   | 18767             | 15015             | 10441.9          | 9290.23          |
| Chr7:12755873-12756152  | 280    | 6113              | 5097              | 3401.26          | 3153.67          |
| Chr7:21302369-21308135  | 5767   | 6250              | 5166              | 3477.48          | 3196.36          |
| Chr8:9193386-9194236    | 851    | 7256              | 5675              | 4037.22          | 3511.29          |

**Bill-siRNA clusters in Nipponbare inflorescence**

| Region                  | Length | inflorescence-R1_reads | inflorescence-R2_reads | inflorescence-R1_RPTM | inflorescence-R2_RPTM |
|-------------------------|--------|------------------------|------------------------|-----------------------|-----------------------|
| Chr1:2521768-2526052    | 4285   | 2627                   | 6895                   | 2904.7                | 5136.67               |
| Chr1:2555529-2560694    | 5166   | 21626                  | 41074                  | 23912.1               | 30599.5               |
| Chr1:5581732-5589426    | 7695   | 1502                   | 3148                   | 1660.78               | 2345.21               |
| Chr1:8599811-8604128    | 4318   | 1747                   | 3329                   | 1931.68               | 2480.05               |
| Chr1:9038763-9044876    | 6114   | 18114                  | 14666                  | 20028.9               | 10925.9               |
| Chr1:9435862-9439656    | 3795   | 23285                  | 35897                  | 25746.5               | 26742.7               |
| Chr1:10921204-10924098  | 2895   | 3046                   | 10412                  | 3368                  | 7756.78               |
| Chr1:10924269-10926494  | 2226   | 16187                  | 21196                  | 17898.1               | 15790.7               |
| Chr1:11189862-11192041  | 2180   | 5892                   | 5818                   | 6514.85               | 4334.32               |
| Chr1:11194294-11201121  | 6828   | 10596                  | 18548                  | 11716.1               | 13818                 |
| Chr1:11360420-11365017  | 4598   | 30604                  | 38089                  | 33839.2               | 28375.7               |
| Chr1:11470333-11475439  | 5107   | 45398                  | 42784                  | 50197.1               | 31873.4               |
| Chr1:12139280-12145453  | 6174   | 9104                   | 8537                   | 10066.4               | 6359.93               |
| Chr1:14333154-14340725  | 7572   | 42230                  | 59509                  | 46694.2               | 44333.3               |
| Chr1:14959355-14964119  | 4765   | 6862                   | 9715                   | 7587.39               | 7237.52               |
| Chr1:20809638-20814813  | 5176   | 6926                   | 15002                  | 7658.15               | 11176.3               |
| Chr1:21008537-21022996  | 14460  | 5334                   | 8183                   | 5897.86               | 6096.21               |
| Chr1:25251535-25254752  | 3218   | 2172                   | 4074                   | 2401.6                | 3035.07               |
| Chr1:25311726-25313703  | 1978   | 4796                   | 8793                   | 5302.99               | 6550.65               |
| Chr1:26580342-26582395  | 2054   | 1912                   | 2966                   | 2114.12               | 2209.62               |
| Chr1:28199276-28206541  | 7266   | 42822                  | 59660                  | 47348.8               | 44445.8               |
| Chr1:28209631-28216676  | 7046   | 22132                  | 32121                  | 24471.6               | 23929.6               |
| Chr1:29052975-29057217  | 4243   | 8800                   | 12889                  | 9730.26               | 9602.1                |
| Chr1:30807171-30812220  | 5050   | 5617                   | 10653                  | 6210.78               | 7936.32               |
| Chr1:38341396-38345532  | 4137   | 1946                   | 3410                   | 2151.71               | 2540.4                |
| Chr10:402185-405250     | 3066   | 2367                   | 3450                   | 2617.22               | 2570.2                |
| Chr10:706248-710643     | 4396   | 11784                  | 19749                  | 13029.7               | 14712.7               |
| Chr10:2403049-2413838   | 10790  | 3462                   | 9830                   | 3827.97               | 7323.2                |
| Chr10:3440819-3446842   | 6024   | 4065                   | 8004                   | 4494.72               | 5962.85               |
| Chr10:5924258-5934240   | 9983   | 39174                  | 58543                  | 43315.1               | 43613.6               |
| Chr10:15985572-15992069 | 6498   | 19388                  | 27659                  | 21437.5               | 20605.5               |
| Chr10:16003028-16005127 | 2100   | 3952                   | 8460                   | 4369.77               | 6302.57               |
| Chr10:16005549-16007061 | 1513   | 7447                   | 17020                  | 8234.23               | 12679.6               |
| Chr10:20776781-20779879 | 3099   | 9200                   | 10614                  | 10172.5               | 7907.26               |
| Chr11:2540766-2543924   | 3159   | 4721                   | 4690                   | 5220.06               | 3493.98               |
| Chr11:3230045-3233542   | 3498   | 16650                  | 19171                  | 18410.1               | 14282.1               |
| Chr11:3993179-4002073   | 8895   | 5279                   | 10803                  | 5837.05               | 8048.07               |
| Chr11:7333517-7336095   | 2579   | 2861                   | 4631                   | 3163.44               | 3450.02               |
| Chr11:7725873-7730813   | 4941   | 3419                   | 4087                   | 3780.43               | 3044.75               |
| Chr11:7731057-7743657   | 12601  | 76385                  | 104865                 | 84459.7               | 78122.8               |
| Chr11:8909723-8916209   | 6487   | 4887                   | 4271                   | 5403.61               | 3181.83               |
| Chr11:16329888-16336863 | 6976   | 59254                  | 66685                  | 65517.8               | 49679.3               |
| Chr11:17164662-17170276 | 5615   | 11086                  | 20021                  | 12257.9               | 14915.3               |
| Chr11:20706536-20709509 | 2974   | 7801                   | 11964                  | 8625.65               | 8912.99               |
| Chr11:22338326-22342986 | 4661   | 2558                   | 5127                   | 2828.41               | 3819.53               |
| Chr11:24386946-24396201 | 9256   | 42023                  | 44558                  | 46465.3               | 33195                 |
| Chr11:27016652-27019288 | 2637   | 6308                   | 7370                   | 6974.83               | 5490.53               |
| Chr12:2870565-2882229   | 11665  | 1829                   | 5785                   | 2022.35               | 4309.73               |
| Chr12:4726889-4738510   | 11622  | 72131                  | 81501                  | 79756                 | 60717                 |
| Chr12:4898715-4904135   | 5421   | 22455                  | 27006                  | 24828.7               | 20119                 |
| Chr12:4909461-4920790   | 11330  | 19298                  | 27242                  | 21338                 | 20294.9               |
| Chr12:5024901-5028293   | 3393   | 2208                   | 2386                   | 2441.41               | 1777.53               |
| Chr12:9061581-9066507   | 4927   | 5206                   | 6557                   | 5756.33               | 4884.86               |
| Chr12:9355708-9356951   | 1244   | 2562                   | 1906                   | 2832.83               | 1419.94               |

|                         |       |       |       |         |         |
|-------------------------|-------|-------|-------|---------|---------|
| Chr12:10115606-10124335 | 8730  | 1665  | 3571  | 1841.01 | 2660.34 |
| Chr12:17499882-17504299 | 4418  | 31960 | 28592 | 35338.5 | 21300.6 |
| Chr12:17984443-17988999 | 4557  | 11323 | 17981 | 12520   | 13395.6 |
| Chr12:18392996-18397217 | 4222  | 5522  | 6470  | 6105.74 | 4820.05 |
| Chr12:18860415-18868291 | 7877  | 12392 | 27162 | 13702   | 20235.3 |
| Chr12:19401294-19406902 | 5609  | 1840  | 6295  | 2034.51 | 4689.68 |
| Chr12:24724955-24735788 | 10834 | 57596 | 79055 | 63684.5 | 58894.7 |
| Chr2:1292570-1294488    | 1919  | 3017  | 2878  | 3335.93 | 2144.06 |
| Chr2:1553161-1553270    | 110   | 124   | 14136 | 137.108 | 10531.1 |
| Chr2:3700050-3702958    | 2909  | 2088  | 2846  | 2308.72 | 2120.23 |
| Chr2:5895693-5907049    | 11357 | 36438 | 39545 | 40289.9 | 29460.4 |
| Chr2:6758841-6765525    | 6685  | 13325 | 19739 | 14733.6 | 14705.2 |
| Chr2:6795056-6797018    | 1963  | 6868  | 10746 | 7594.02 | 8005.6  |
| Chr2:6797248-6798640    | 1393  | 5673  | 5499  | 6272.7  | 4096.67 |
| Chr2:7603808-7610062    | 6255  | 18680 | 21215 | 20654.7 | 15804.8 |
| Chr2:8343265-8346971    | 3707  | 14307 | 19778 | 15819.4 | 14734.3 |
| Chr2:8347074-8350038    | 2965  | 2309  | 3070  | 2553.09 | 2287.1  |
| Chr2:13580482-13582726  | 2245  | 3397  | 3513  | 3756.1  | 2617.13 |
| Chr2:13582836-13584440  | 1605  | 7388  | 11931 | 8168.99 | 8888.41 |
| Chr2:13584554-13586359  | 1806  | 10065 | 10881 | 11129   | 8106.17 |
| Chr2:17352298-17362667  | 10370 | 3197  | 7778  | 3534.96 | 5794.49 |
| Chr2:19469238-19471202  | 1965  | 9594  | 19400 | 10608.2 | 14452.7 |
| Chr2:29633230-29636002  | 2773  | 3844  | 6077  | 4250.35 | 4527.27 |
| Chr2:29777060-29783044  | 5985  | 5809  | 9386  | 6423.08 | 6992.42 |
| Chr3:12967075-12976151  | 9077  | 4072  | 7419  | 4502.46 | 5527.04 |
| Chr3:15609453-15614434  | 4982  | 2929  | 3762  | 3238.63 | 2802.63 |
| Chr3:16790240-16793888  | 3649  | 2185  | 3100  | 2415.98 | 2309.45 |
| Chr3:17534172-17543694  | 9523  | 5416  | 3953  | 5988.53 | 2944.92 |
| Chr3:20789817-20792348  | 2532  | 2287  | 2011  | 2528.76 | 1498.16 |
| Chr3:22402292-22412222  | 9931  | 42226 | 42969 | 46689.8 | 32011.2 |
| Chr3:24566447-24574082  | 7636  | 35515 | 40864 | 39269.3 | 30443   |
| Chr3:24601028-24606935  | 5908  | 11969 | 15266 | 13234.3 | 11372.9 |
| Chr3:26123020-26126247  | 3228  | 9410  | 17259 | 10404.7 | 12857.7 |
| Chr3:27617297-27621763  | 4467  | 9936  | 16455 | 10986.3 | 12258.7 |
| Chr3:28510208-28512514  | 2307  | 2359  | 2888  | 2608.37 | 2151.51 |
| Chr3:29751814-29757515  | 5702  | 4199  | 3891  | 4642.88 | 2898.73 |
| Chr4:4588570-4593843    | 5274  | 1858  | 4531  | 2054.41 | 3375.52 |
| Chr4:11651697-11659198  | 7502  | 2907  | 5874  | 3214.3  | 4376.04 |
| Chr4:19681237-19685224  | 3988  | 7526  | 9336  | 8321.58 | 6955.17 |
| Chr4:26770125-26774265  | 4141  | 1718  | 5445  | 1899.61 | 4056.44 |
| Chr4:35049575-35053502  | 3928  | 27643 | 31088 | 30565.2 | 23160.1 |
| Chr5:661784-664204      | 2421  | 1627  | 3393  | 1798.99 | 2527.73 |
| Chr5:1132468-1140507    | 8040  | 15917 | 24430 | 17599.6 | 18200   |
| Chr5:1680413-1685418    | 5006  | 7138  | 13497 | 7892.57 | 10055.1 |
| Chr5:4824684-4831616    | 6933  | 9306  | 14400 | 10289.7 | 10727.8 |
| Chr5:10916862-10920212  | 3351  | 11707 | 15457 | 12944.6 | 11515.2 |
| Chr5:10920338-10923044  | 2707  | 3129  | 5343  | 3459.77 | 3980.45 |
| Chr5:11242416-11247317  | 4902  | 30080 | 44552 | 33259.8 | 33190.5 |
| Chr5:16055424-16058088  | 2665  | 7045  | 9093  | 7789.73 | 6774.14 |
| Chr5:18245583-18250825  | 5243  | 1078  | 3800  | 1191.96 | 2830.94 |
| Chr5:19884414-19887313  | 2900  | 2169  | 3066  | 2398.29 | 2284.12 |
| Chr5:25352163-25357799  | 5637  | 40783 | 57544 | 45094.2 | 42869.4 |
| Chr5:26871602-26874206  | 2605  | 7858  | 11473 | 8688.68 | 8547.2  |
| Chr6:2605685-2612791    | 7107  | 1957  | 5488  | 2163.88 | 4088.47 |
| Chr6:6078050-6083497    | 5448  | 20077 | 19599 | 22199.4 | 14600.9 |
| Chr6:6420375-6424515    | 4141  | 1493  | 4229  | 1650.83 | 3150.54 |
| Chr6:7535124-7539311    | 4188  | 20019 | 29031 | 22135.2 | 21627.6 |
| Chr6:11299378-11306310  | 6933  | 23604 | 32064 | 26099.2 | 23887.2 |
| Chr6:13424568-13438590  | 14023 | 62500 | 88610 | 69106.9 | 66013.1 |
| Chr6:17320067-17323412  | 3346  | 3581  | 3382  | 3959.55 | 2519.54 |
| Chr6:19709922-19712027  | 2106  | 4907  | 4784  | 5425.72 | 3564    |
| Chr6:21224117-21229217  | 5101  | 3124  | 4682  | 3454.24 | 3488.02 |
| Chr6:25786623-25794475  | 7853  | 1095  | 4417  | 1210.75 | 3290.6  |
| Chr6:27798029-27809477  | 11449 | 32340 | 44968 | 35758.7 | 33500.5 |
| Chr6:28515426-28518629  | 3204  | 4926  | 8748  | 5446.73 | 6517.12 |
| Chr6:29376920-29380615  | 3696  | 33523 | 50394 | 37066.8 | 37542.7 |
| Chr7:995670-1002285     | 6616  | 4879  | 6773  | 5394.76 | 5045.78 |
| Chr7:4346348-4353167    | 6820  | 30032 | 46656 | 33206.7 | 34758   |
| Chr7:4372363-4377384    | 5022  | 24835 | 29814 | 27460.3 | 22211   |
| Chr7:4703565-4710602    | 7038  | 2132  | 5532  | 2357.38 | 4121.25 |
| Chr7:4988771-4998928    | 10158 | 3007  | 8817  | 3324.87 | 6568.53 |
| Chr7:8049445-8056572    | 7128  | 1068  | 3893  | 1180.9  | 2900.22 |
| Chr7:8291378-8301022    | 9645  | 21362 | 24845 | 23620.2 | 18509.1 |
| Chr7:15712491-15717966  | 5476  | 7470  | 11427 | 8259.66 | 8512.94 |
| Chr7:15985944-15991071  | 5128  | 16937 | 15273 | 18727.4 | 11378.1 |
| Chr7:19997762-20003812  | 6051  | 5672  | 9608  | 6271.59 | 7157.81 |
| Chr7:20003935-20006845  | 2911  | 1812  | 5698  | 2003.55 | 4244.92 |
| Chr7:21685705-21693930  | 8226  | 2016  | 5768  | 2229.11 | 4297.07 |
| Chr7:21714119-21720197  | 6079  | 2627  | 7860  | 2904.7  | 5855.58 |
| Chr7:23519975-23522299  | 2325  | 8423  | 10618 | 9313.4  | 7910.24 |
| Chr7:27168180-27170308  | 2129  | 1967  | 3615  | 2174.93 | 2693.12 |
| Chr8:4307930-4312926    | 4997  | 1621  | 3757  | 1792.36 | 2798.91 |
| Chr8:5776237-5781355    | 5119  | 11903 | 17170 | 13161.3 | 12791.4 |
| Chr8:7667556-7673918    | 6363  | 9803  | 11376 | 10839.3 | 8474.94 |
| Chr8:7762814-7770869    | 8056  | 26914 | 29225 | 29759.1 | 21772.2 |
| Chr8:8702577-8702970    | 394   | 5578  | 3552  | 6167.66 | 2646.18 |
| Chr8:9443716-9449228    | 5513  | 4962  | 7612  | 5486.54 | 5670.82 |
| Chr8:10491663-10502271  | 10609 | 32329 | 35776 | 35746.5 | 26652.6 |

|                        |       |       |        |         |         |
|------------------------|-------|-------|--------|---------|---------|
| Chr8:10866511-10873300 | 6790  | 1033  | 4378   | 1142.2  | 3261.54 |
| Chr8:10890143-10894812 | 4670  | 1647  | 3931   | 1821.11 | 2928.53 |
| Chr8:15452051-15462294 | 10244 | 88167 | 101079 | 97487.2 | 75302.3 |
| Chr8:15463916-15466938 | 3023  | 3818  | 4648   | 4221.6  | 3462.69 |
| Chr8:16973609-16980517 | 6909  | 8634  | 10783  | 9546.71 | 8033.17 |
| Chr8:20978669-20986760 | 8092  | 9172  | 21381  | 10141.6 | 15928.5 |
| Chr8:21691355-21695670 | 4316  | 12615 | 16536  | 13948.5 | 12319.1 |
| Chr8:22467505-22472176 | 4672  | 1230  | 4492   | 1360.02 | 3346.47 |
| Chr8:22504024-22508062 | 4039  | 1060  | 4131   | 1172.05 | 3077.53 |
| Chr8:27144229-27147566 | 3338  | 11362 | 7860   | 12563.1 | 5855.58 |
| Chr9:1290331-1297850   | 7520  | 4834  | 9754   | 5345.01 | 7266.58 |
| Chr9:3227798-3229687   | 1890  | 2652  | 3321   | 2932.35 | 2474.09 |
| Chr9:3229897-3231863   | 1967  | 2360  | 4564   | 2609.48 | 3400.11 |
| Chr9:3510381-3520050   | 9670  | 2699  | 2528   | 2984.31 | 1883.32 |
| Chr9:5769286-5778227   | 8942  | 1556  | 4640   | 1720.49 | 3456.73 |
| Chr9:9556900-9558463   | 1564  | 2417  | 3567   | 2672.5  | 2657.36 |
| Chr9:12418744-12427530 | 8787  | 5337  | 6917   | 5901.18 | 5153.06 |
| Chr9:12621918-12623526 | 1609  | 3307  | 3522   | 3656.59 | 2623.83 |
| Chr9:15228002-15232300 | 4299  | 4830  | 6579   | 5340.58 | 4901.25 |
| Chr9:16533262-16541018 | 7757  | 3033  | 7252   | 3353.62 | 5402.63 |
| Chr9:16723081-16727730 | 4650  | 29508 | 39096  | 32627.3 | 29125.9 |

#### Bill-siRNA clusters in Nipponbare ovary

| Region                  | Length | ovary_reads | ovary_RPTM |
|-------------------------|--------|-------------|------------|
| Chr1:2521844-2525545    | 3702   | 8576        | 7934.62    |
| Chr1:2555529-2560448    | 4920   | 59626       | 55166.7    |
| Chr1:9039468-9043459    | 3992   | 15819       | 14635.9    |
| Chr1:9435925-9439656    | 3732   | 50224       | 46467.8    |
| Chr1:10922855-10924098  | 1244   | 15258       | 14116.9    |
| Chr1:10924269-10926494  | 2226   | 42643       | 39453.8    |
| Chr1:11188466-11189659  | 1194   | 2558        | 2366.69    |
| Chr1:11189862-11191482  | 1621   | 9442        | 8735.85    |
| Chr1:11195592-11200861  | 5270   | 20356       | 18833.6    |
| Chr1:11360445-11364759  | 4315   | 75563       | 69911.8    |
| Chr1:11470338-11475439  | 5102   | 79149       | 73229.6    |
| Chr1:12141521-12144908  | 3388   | 5117        | 4734.31    |
| Chr1:14333181-14340292  | 7112   | 113393      | 104913     |
| Chr1:14959477-14963426  | 3950   | 16419       | 15191.1    |
| Chr1:20809443-20814598  | 5156   | 22228       | 20565.6    |
| Chr1:21008538-21014877  | 6340   | 9650        | 8928.29    |
| Chr1:25251520-25254709  | 3190   | 8514        | 7877.25    |
| Chr1:25311726-25313703  | 1978   | 15834       | 14649.8    |
| Chr1:26580524-26582469  | 1946   | 4094        | 3787.82    |
| Chr1:28199278-28206541  | 7264   | 91550       | 84703.1    |
| Chr1:28209633-28216658  | 7026   | 41598       | 38487      |
| Chr1:29053164-29056607  | 3444   | 16537       | 15300.2    |
| Chr1:30808064-30812190  | 4127   | 17943       | 16601.1    |
| Chr1:38450707-38453768  | 3062   | 4107        | 3799.84    |
| Chr10:401914-403983     | 2070   | 3986        | 3687.89    |
| Chr10:706272-710633     | 4362   | 36959       | 34194.9    |
| Chr10:5925568-5934240   | 8673   | 103078      | 95369      |
| Chr10:11208276-11213222 | 4947   | 2361        | 2184.42    |
| Chr10:15986726-15991294 | 4569   | 35608       | 32944.9    |
| Chr10:16003038-16005189 | 2152   | 5643        | 5220.97    |
| Chr10:16005552-16007049 | 1498   | 19135       | 17703.9    |
| Chr10:20776792-20779600 | 2809   | 19488       | 18030.5    |
| Chr11:3230045-3232308   | 2264   | 34975       | 32359.3    |
| Chr11:7332657-7335666   | 3010   | 10821       | 10011.7    |
| Chr11:7731054-7735579   | 4526   | 114710      | 106131     |
| Chr11:7735686-7742719   | 7034   | 63993       | 59207.1    |
| Chr11:8910747-8913303   | 2557   | 2240        | 2072.47    |
| Chr11:16330307-16336817 | 6511   | 121346      | 112271     |
| Chr11:17164714-17170193 | 5480   | 25690       | 23768.7    |
| Chr11:19254455-19256354 | 1900   | 2546        | 2355.59    |
| Chr11:20706558-20709374 | 2817   | 23173       | 21439.9    |
| Chr11:22338335-22342969 | 4635   | 5928        | 5484.66    |
| Chr11:24387542-24394638 | 7097   | 50954       | 47143.2    |
| Chr11:27016911-27019288 | 2378   | 10212       | 9448.26    |
| Chr12:4727561-4738238   | 10678  | 163098      | 150900     |
| Chr12:4898742-4904118   | 5377   | 40094       | 37095.4    |
| Chr12:4911982-4917759   | 5778   | 40474       | 37447      |
| Chr12:9061767-9066481   | 4715   | 7541        | 6977.02    |
| Chr12:10927193-10928982 | 1790   | 2359        | 2182.57    |
| Chr12:17500450-17504299 | 3850   | 65373       | 60483.9    |
| Chr12:17984443-17988995 | 4553   | 33899       | 31363.8    |
| Chr12:18392996-18394295 | 1300   | 5323        | 4924.9     |
| Chr12:18395684-18397217 | 1534   | 3446        | 3188.28    |
| Chr12:18860618-18867498 | 6881   | 42782       | 39582.4    |
| Chr12:24728001-24734673 | 6673   | 125729      | 116326     |
| Chr2:3700051-3702965    | 2915   | 7078        | 6548.65    |
| Chr2:5900748-5907257    | 6510   | 81371       | 75285.4    |
| Chr2:6759382-6763679    | 4298   | 30285       | 28020      |
| Chr2:6795024-6797015    | 1992   | 16995       | 15724      |
| Chr2:6797246-6798459    | 1214   | 11292       | 10447.5    |
| Chr2:7605635-7610028    | 4394   | 46593       | 43108.4    |

|                        |       |        |         |
|------------------------|-------|--------|---------|
| Chr2:8343301-8346968   | 3668  | 35706  | 33035.6 |
| Chr2:13580615-13582726 | 2112  | 5480   | 5070.16 |
| Chr2:13582842-13584440 | 1599  | 22539  | 20853.3 |
| Chr2:13584555-13586314 | 1760  | 26505  | 24522.7 |
| Chr2:19469288-19471202 | 1915  | 31430  | 29079.4 |
| Chr2:29633236-29635858 | 2623  | 7929   | 7336    |
| Chr2:29777051-29782774 | 5724  | 14196  | 13134.3 |
| Chr2:34951976-34953742 | 1767  | 3282   | 3036.54 |
| Chr3:12709654-12710829 | 1176  | 4169   | 3857.21 |
| Chr3:12711051-12713166 | 2116  | 4022   | 3721.2  |
| Chr3:15611459-15613388 | 1930  | 5607   | 5187.66 |
| Chr3:16790320-16793973 | 3654  | 6140   | 5680.8  |
| Chr3:19352637-19356624 | 3988  | 2932   | 2712.72 |
| Chr3:20792461-20793650 | 1190  | 2294   | 2122.44 |
| Chr3:22293543-22296227 | 2685  | 3385   | 3131.84 |
| Chr3:22402851-22411450 | 8600  | 90234  | 83485.6 |
| Chr3:24566548-24574110 | 7563  | 64241  | 59436.5 |
| Chr3:24601688-24606560 | 4873  | 28588  | 26450   |
| Chr3:26123012-26126243 | 3232  | 32921  | 30458.9 |
| Chr3:26143500-26144629 | 1130  | 2699   | 2497.15 |
| Chr3:27617781-27619388 | 1608  | 7376   | 6824.36 |
| Chr3:27619511-27621774 | 2264  | 18201  | 16839.8 |
| Chr3:27940887-27943015 | 2129  | 2327   | 2152.97 |
| Chr3:28510208-28512378 | 2171  | 8592   | 7949.42 |
| Chr3:29751814-29754615 | 2802  | 2532   | 2342.64 |
| Chr4:11651952-11657426 | 5475  | 11637  | 10766.7 |
| Chr4:17845592-17848967 | 3376  | 2480   | 2294.53 |
| Chr4:19681575-19685138 | 3564  | 18956  | 17538.3 |
| Chr4:20353517-20355297 | 1781  | 2292   | 2120.59 |
| Chr4:32565887-32567718 | 1832  | 3543   | 3278.03 |
| Chr4:35049584-35053502 | 3919  | 68363  | 63250.2 |
| Chr5:661703-665576     | 3874  | 5649   | 5226.52 |
| Chr5:1134469-1140452   | 5984  | 26959  | 24942.8 |
| Chr5:1680412-1684307   | 3896  | 21642  | 20023.4 |
| Chr5:4824694-4831581   | 6888  | 19528  | 18067.5 |
| Chr5:10917329-10920212 | 2884  | 25845  | 23912.1 |
| Chr5:10920342-10922460 | 2119  | 3827   | 3540.79 |
| Chr5:11242416-11246770 | 4355  | 65400  | 60508.8 |
| Chr5:13079676-13081371 | 1696  | 2169   | 2006.78 |
| Chr5:16055424-16058037 | 2614  | 15623  | 14454.6 |
| Chr5:19884425-19886842 | 2418  | 2822   | 2610.95 |
| Chr5:25352166-25357301 | 5136  | 125817 | 116407  |
| Chr5:26871715-26874206 | 2492  | 19220  | 17782.6 |
| Chr5:27489463-27491629 | 2167  | 2724   | 2520.28 |
| Chr6:6078050-6082334   | 4285  | 32313  | 29896.4 |
| Chr6:7380761-7383367   | 2607  | 2818   | 2607.25 |
| Chr6:7535106-7539308   | 4203  | 55255  | 51122.6 |
| Chr6:11300484-11305697 | 5214  | 54265  | 50206.6 |
| Chr6:13424897-13437332 | 12436 | 134932 | 124841  |
| Chr6:17320233-17323410 | 3178  | 5943   | 5498.53 |
| Chr6:17673971-17676421 | 2451  | 5400   | 4996.14 |
| Chr6:18068855-18071342 | 2488  | 3331   | 3081.88 |
| Chr6:19709919-19712027 | 2109  | 6436   | 5954.66 |
| Chr6:21225606-21227918 | 2313  | 4595   | 4251.35 |
| Chr6:27798395-27809150 | 10756 | 70599  | 65319   |
| Chr6:28515525-28518630 | 3106  | 11929  | 11036.9 |
| Chr6:29376920-29381191 | 4272  | 86880  | 80382.4 |
| Chr7:996003-1001329    | 5327  | 10923  | 10106.1 |
| Chr7:3900364-3903253   | 2890  | 3028   | 2801.54 |
| Chr7:4348715-4353178   | 4464  | 78784  | 72891.9 |
| Chr7:4372345-4376274   | 3930  | 51877  | 47997.2 |
| Chr7:5719332-5723278   | 3947  | 3484   | 3223.44 |
| Chr7:8295242-8301023   | 5782  | 37657  | 34840.7 |
| Chr7:12422161-12424012 | 1852  | 2496   | 2309.33 |
| Chr7:15676996-15677882 | 887   | 3912   | 3619.43 |
| Chr7:15712854-15717796 | 4943  | 20012  | 18515.3 |
| Chr7:15986496-15991075 | 4580  | 34511  | 31930   |
| Chr7:19999609-20003812 | 4204  | 12910  | 11944.5 |
| Chr7:20003949-20005234 | 1286  | 2364   | 2187.2  |
| Chr7:22459903-22462003 | 2101  | 3320   | 3071.7  |
| Chr7:23520073-23522005 | 1933  | 11762  | 10882.3 |
| Chr7:27168208-27170301 | 2094  | 6515   | 6027.75 |
| Chr8:5776604-5780800   | 4197  | 23136  | 21405.7 |
| Chr8:7325192-7326190   | 999   | 2426   | 2244.56 |
| Chr8:7667556-7671308   | 3753  | 10352  | 9577.79 |
| Chr8:7763655-7770869   | 7215  | 58782  | 54385.8 |
| Chr8:8446598-8450020   | 3423  | 3270   | 3025.44 |
| Chr8:9443293-9449278   | 5986  | 12350  | 11426.4 |
| Chr8:10491813-10500449 | 8637  | 80024  | 74039.1 |
| Chr8:15383621-15386899 | 3279  | 3012   | 2786.74 |
| Chr8:15452051-15462294 | 10244 | 173350 | 160385  |
| Chr8:16975162-16979983 | 4822  | 21360  | 19762.5 |
| Chr8:20978754-20986055 | 7302  | 22849  | 21140.2 |
| Chr8:21691366-21695670 | 4305  | 29811  | 27581.5 |
| Chr8:27145005-27147561 | 2557  | 17336  | 16039.5 |
| Chr9:1293310-1297850   | 4541  | 11970  | 11074.8 |
| Chr9:3227834-3229695   | 1862  | 5527   | 5113.65 |
| Chr9:3229897-3231498   | 1602  | 4848   | 4485.43 |

|                        |      |       |         |
|------------------------|------|-------|---------|
| Chr9:3510498-3519634   | 9137 | 3709  | 3431.61 |
| Chr9:9556907-9558881   | 1975 | 6633  | 6136.93 |
| Chr9:12177687-12182797 | 5111 | 4271  | 3951.58 |
| Chr9:12418744-12420519 | 1776 | 2754  | 2548.03 |
| Chr9:12420622-12427022 | 6401 | 8377  | 7750.5  |
| Chr9:12621913-12623471 | 1559 | 4770  | 4413.26 |
| Chr9:15228199-15232299 | 4101 | 8535  | 7896.68 |
| Chr9:16723081-16726908 | 3828 | 83046 | 76835.1 |
| Chr9:17428907-17430558 | 1652 | 3253  | 3009.71 |

#### Bill-siRNA clusters in Nipponbare bract

| Region                  | Length | bract_reads | bract_RPTM |
|-------------------------|--------|-------------|------------|
| Chr1:2555565-2559538    | 3974   | 4123        | 6730.01    |
| Chr1:9436150-9439635    | 3486   | 4821        | 7869.37    |
| Chr1:10923058-10924089  | 1032   | 1276        | 2082.83    |
| Chr1:10924271-10926493  | 2223   | 2889        | 4715.74    |
| Chr1:11360926-11364464  | 3539   | 5937        | 9691.02    |
| Chr1:11470886-11475397  | 4512   | 6158        | 10051.8    |
| Chr1:14333332-14336317  | 2986   | 3844        | 6274.6     |
| Chr1:14336425-14338650  | 2226   | 2863        | 4673.3     |
| Chr1:14338763-14339975  | 1213   | 1559        | 2544.77    |
| Chr1:25311955-25313671  | 1717   | 1256        | 2050.18    |
| Chr1:28200328-28206531  | 6204   | 7851        | 12815.3    |
| Chr1:28210040-28214677  | 4638   | 3098        | 5056.9     |
| Chr1:29053833-29056279  | 2447   | 1261        | 2058.34    |
| Chr10:707138-709675     | 2538   | 2916        | 4759.82    |
| Chr10:5926931-5932489   | 5559   | 7262        | 11853.8    |
| Chr10:10320909-10320961 | 53     | 6372        | 10401.1    |
| Chr10:15987356-15991138 | 3783   | 2420        | 3950.19    |
| Chr10:16005555-16007061 | 1507   | 1587        | 2590.48    |
| Chr10:20777278-20779305 | 2028   | 1670        | 2725.96    |
| Chr11:3230056-3231775   | 1720   | 2408        | 3930.6     |
| Chr11:7731185-7735578   | 4394   | 10341       | 16879.7    |
| Chr11:7735688-7738615   | 2928   | 1499        | 2446.83    |
| Chr11:7738737-7741735   | 2999   | 3051        | 4980.18    |
| Chr11:9798169-9798270   | 102    | 2865        | 4676.57    |
| Chr11:16332390-16336650 | 4261   | 9484        | 15480.8    |
| Chr11:17165906-17168443 | 2538   | 1326        | 2164.44    |
| Chr11:20706562-20708264 | 1703   | 1420        | 2317.88    |
| Chr11:24389485-24393129 | 3645   | 1877        | 3063.85    |
| Chr11:24393231-24394618 | 1388   | 1741        | 2841.85    |
| Chr12:4729407-4736295   | 6889   | 11426       | 18650.8    |
| Chr12:4736403-4737273   | 871    | 1588        | 2592.11    |
| Chr12:4899116-4901879   | 2764   | 2834        | 4625.97    |
| Chr12:4912411-4914505   | 2095   | 1402        | 2288.5     |
| Chr12:4914640-4916540   | 1901   | 1231        | 2009.37    |
| Chr12:9355714-9356917   | 1204   | 3370        | 5500.88    |
| Chr12:17500453-17503989 | 3537   | 4861        | 7934.66    |
| Chr12:17986446-17988664 | 2219   | 1722        | 2810.84    |
| Chr12:18864068-18866206 | 2139   | 2383        | 3889.79    |
| Chr12:24728452-24730449 | 1998   | 4335        | 7076.06    |
| Chr12:24730552-24733990 | 3439   | 7061        | 11525.7    |
| Chr2:1553161-1553230    | 70     | 3659        | 5972.62    |
| Chr2:5902855-5906581    | 3727   | 5921        | 9664.91    |
| Chr2:6759920-6762767    | 2848   | 1824        | 2977.33    |
| Chr2:7605638-7609291    | 3654   | 2589        | 4226.05    |
| Chr2:8343791-8346311    | 2521   | 2333        | 3808.18    |
| Chr2:8522080-8522114    | 35     | 7583        | 12377.8    |
| Chr2:8525230-8525258    | 29     | 8358        | 13642.8    |
| Chr2:13582846-13584440  | 1595   | 1620        | 2644.34    |
| Chr2:13584567-13586310  | 1744   | 1932        | 3153.62    |
| Chr2:19469624-19471187  | 1564   | 2648        | 4322.36    |
| Chr3:22406877-22410687  | 3811   | 7321        | 11950.1    |
| Chr3:24569582-24572160  | 2579   | 4168        | 6803.47    |
| Chr3:24602670-24605086  | 2417   | 1602        | 2614.96    |
| Chr3:26123106-26126043  | 2938   | 2294        | 3744.52    |
| Chr4:35050618-35053502  | 2885   | 3918        | 6395.39    |
| Chr5:1135893-1139298    | 3406   | 1795        | 2930       |
| Chr5:10917774-10920198  | 2425   | 1772        | 2892.45    |
| Chr5:11242427-11246614  | 4188   | 6049        | 9873.84    |
| Chr5:25352988-25356776  | 3789   | 8428        | 13757.1    |
| Chr6:6078050-6080881    | 2832   | 2178        | 3555.17    |
| Chr6:7535833-7538922    | 3090   | 3774        | 6160.34    |
| Chr6:11302776-11304967  | 2192   | 4303        | 7023.83    |
| Chr6:13330467-13330592  | 126    | 5914        | 9653.48    |
| Chr6:13425429-13427842  | 2414   | 1398        | 2281.97    |
| Chr6:13427987-13432273  | 4287   | 10103       | 16491.2    |
| Chr6:27802758-27808793  | 6036   | 5718        | 9333.55    |
| Chr6:29377010-29380073  | 3064   | 7899        | 12893.6    |
| Chr7:136355-139466      | 3112   | 3167        | 5169.53    |
| Chr7:4348789-4353078    | 4290   | 5607        | 9152.36    |
| Chr7:4373867-4376294    | 2428   | 4072        | 6646.77    |
| Chr7:8295263-8298599    | 3337   | 2495        | 4072.61    |
| Chr7:12756069-12756150  | 82     | 11019       | 17986.4    |
| Chr7:15987271-15990551  | 3281   | 1908        | 3114.45    |

|                        |      |       |         |
|------------------------|------|-------|---------|
| Chr8:5778379-5780180   | 1802 | 1256  | 2050.18 |
| Chr8:7767689-7769795   | 2107 | 2632  | 4296.24 |
| Chr8:10492041-10499590 | 7550 | 5737  | 9364.56 |
| Chr8:15453469-15462092 | 8624 | 16232 | 26495.7 |
| Chr8:20899837-20900339 | 503  | 3476  | 5673.91 |
| Chr8:20981115-20985580 | 4466 | 1779  | 2903.88 |
| Chr8:21692748-21694270 | 1523 | 1252  | 2043.65 |
| Chr8:26181375-26181458 | 84   | 1988  | 3245.03 |
| Chr8:27145500-27147348 | 1849 | 1274  | 2079.56 |
| Chr9:16723103-16726642 | 3540 | 6266  | 10228.1 |

#### Bill-siRNA clusters in Nipponbare branch

| Region                  | Length | branch_reads | branch_RPTM |
|-------------------------|--------|--------------|-------------|
| Chr1:9436509-9439638    | 3130   | 3249         | 3303.95     |
| Chr1:11361251-11363743  | 2493   | 2445         | 2486.35     |
| Chr1:14333568-14336302  | 2735   | 2395         | 2435.51     |
| Chr1:28200325-28202175  | 1851   | 2038         | 2072.47     |
| Chr1:28202292-28203296  | 1005   | 1991         | 2024.68     |
| Chr1:30298209-30298439  | 231    | 2883         | 2931.76     |
| Chr10:5928582-5932457   | 3876   | 3574         | 3634.45     |
| Chr10:10320909-10320938 | 30     | 8915         | 9065.79     |
| Chr10:20859032-20859299 | 268    | 2600         | 2643.98     |
| Chr11:7731940-7734461   | 2522   | 4190         | 4260.87     |
| Chr11:9798167-9798290   | 124    | 4244         | 4315.78     |
| Chr11:16312182-16312395 | 214    | 2779         | 2826        |
| Chr11:16332382-16336650 | 4269   | 5134         | 5220.84     |
| Chr11:20715970-20716088 | 119    | 2113         | 2148.74     |
| Chr12:4733378-4736277   | 2900   | 4015         | 4082.91     |
| Chr12:9355709-9356885   | 1177   | 3923         | 3989.35     |
| Chr12:24728404-24730422 | 2019   | 2153         | 2189.42     |
| Chr12:24730552-24732124 | 1573   | 2459         | 2500.59     |
| Chr2:1553161-1553230    | 70     | 3836         | 3900.88     |
| Chr2:5904975-5906828    | 1854   | 2126         | 2161.96     |
| Chr2:8522083-8522114    | 32     | 17276        | 17568.2     |
| Chr2:8525232-8525258    | 27     | 14025        | 14262.2     |
| Chr2:9902423-9902539    | 117    | 2226         | 2263.65     |
| Chr2:17987103-17987205  | 103    | 3197         | 3251.07     |
| Chr2:25352977-25353145  | 169    | 2020         | 2054.17     |
| Chr3:22408354-22409951  | 1598   | 2631         | 2675.5      |
| Chr4:8302174-8302676    | 503    | 2289         | 2327.72     |
| Chr4:23615771-23615947  | 177    | 3432         | 3490.05     |
| Chr5:11242587-11245292  | 2706   | 3092         | 3144.3      |
| Chr5:25353338-25356925  | 3588   | 4843         | 4924.91     |
| Chr6:11302835-11304809  | 1975   | 2253         | 2291.11     |
| Chr6:13330467-13330592  | 126    | 9724         | 9888.47     |
| Chr6:13427996-13430856  | 2861   | 4572         | 4649.33     |
| Chr6:27801821-27806496  | 4676   | 3176         | 3229.72     |
| Chr6:29377010-29380135  | 3126   | 5106         | 5192.36     |
| Chr7:136365-138754      | 2390   | 3892         | 3957.83     |
| Chr7:4348715-4353061    | 4347   | 2255         | 2293.14     |
| Chr7:12756069-12756150  | 82     | 16672        | 16954       |
| Chr8:10496169-10500151  | 3983   | 2982         | 3032.44     |
| Chr8:15454505-15458779  | 4275   | 4634         | 4712.38     |
| Chr8:15459026-15462089  | 3064   | 3980         | 4047.32     |
| Chr8:20900013-20900339  | 327    | 4312         | 4384.93     |
| Chr8:26181386-26181458  | 73     | 4657         | 4735.77     |
| Chr9:10619367-10619814  | 448    | 5406         | 5497.44     |
| Chr9:14466940-14467068  | 129    | 2120         | 2155.86     |
| Chr9:16723927-16726377  | 2451   | 2573         | 2616.52     |

#### Bill-siRNA clusters in Nipponbare stamen

| Region                  | Length | stamen_reads | stamen_RPTM |
|-------------------------|--------|--------------|-------------|
| Chr1:2555565-2559450    | 3886   | 3265         | 3551.79     |
| Chr1:9436150-9439650    | 3501   | 5611         | 6103.85     |
| Chr1:10924273-10926493  | 2221   | 2586         | 2813.15     |
| Chr1:11361161-11364515  | 3355   | 6781         | 7376.62     |
| Chr1:11470690-11475204  | 4515   | 5718         | 6220.25     |
| Chr1:13389805-13392416  | 2612   | 25244        | 27461.4     |
| Chr1:14333509-14338649  | 5141   | 6135         | 6673.88     |
| Chr1:22638675-22639984  | 1310   | 7299         | 7940.12     |
| Chr1:28200187-28206540  | 6354   | 8235         | 8958.34     |
| Chr1:28212846-28214674  | 1829   | 2312         | 2515.08     |
| Chr10:707125-709080     | 1956   | 2088         | 2271.4      |
| Chr10:5863800-5864813   | 1014   | 2375         | 2583.61     |
| Chr10:5928579-5932459   | 3881   | 6747         | 7339.63     |
| Chr10:15987295-15991263 | 3969   | 2378         | 2586.88     |
| Chr11:959469-960198     | 730    | 13827        | 15041.5     |
| Chr11:3230045-3232270   | 2226   | 2166         | 2356.25     |
| Chr11:6403924-6404788   | 865    | 4097         | 4456.87     |
| Chr11:7731178-7734501   | 3324   | 9344         | 10164.7     |
| Chr11:7735700-7741734   | 6035   | 4500         | 4895.27     |

|                         |      |       |         |
|-------------------------|------|-------|---------|
| Chr11:16332252-16336558 | 4307 | 8824  | 9599.07 |
| Chr11:24388697-24392981 | 4285 | 2086  | 2269.23 |
| Chr11:24393090-24394620 | 1531 | 2234  | 2430.23 |
| Chr12:4729451-4736278   | 6828 | 10722 | 11663.8 |
| Chr12:4898973-4901944   | 2972 | 2704  | 2941.51 |
| Chr12:9355713-9356881   | 1169 | 5112  | 5561.02 |
| Chr12:17500947-17503828 | 2882 | 4643  | 5050.83 |
| Chr12:17985691-17988719 | 3029 | 2121  | 2307.3  |
| Chr12:18864068-18866169 | 2102 | 2084  | 2267.05 |
| Chr12:23211154-23211743 | 590  | 5915  | 6434.55 |
| Chr12:24728404-24730449 | 2046 | 4349  | 4731    |
| Chr12:24730559-24732147 | 1589 | 5740  | 6244.18 |
| Chr12:24732257-24734673 | 2417 | 1956  | 2127.81 |
| Chr2:5903208-5906599    | 3392 | 6649  | 7233.03 |
| Chr2:6001388-6001878    | 491  | 2027  | 2205.05 |
| Chr2:7606171-7609153    | 2983 | 2445  | 2659.76 |
| Chr2:8343697-8346273    | 2577 | 2276  | 2475.92 |
| Chr2:8522078-8522112    | 35   | 5385  | 5858    |
| Chr2:8525230-8525258    | 29   | 6078  | 6611.87 |
| Chr2:11111727-11114927  | 3201 | 3679  | 4002.15 |
| Chr2:13584569-13586310  | 1742 | 2063  | 2244.21 |
| Chr3:22087978-22088202  | 225  | 2519  | 2740.26 |
| Chr3:22406873-22410756  | 3884 | 8475  | 9219.42 |
| Chr3:24569592-24572543  | 2952 | 4850  | 5276.01 |
| Chr3:26123107-26126009  | 2903 | 2041  | 2220.27 |
| Chr3:29756833-29756968  | 136  | 5475  | 5955.91 |
| Chr4:35050618-35053500  | 2883 | 4672  | 5082.37 |
| Chr5:11242434-11246731  | 4298 | 7231  | 7866.15 |
| Chr5:17801991-17802387  | 397  | 5077  | 5522.95 |
| Chr5:18834207-18834628  | 422  | 1844  | 2005.97 |
| Chr5:25353010-25356767  | 3758 | 7966  | 8665.71 |
| Chr6:6078051-6080845    | 2795 | 1849  | 2011.41 |
| Chr6:7535842-7538898    | 3057 | 3429  | 3730.19 |
| Chr6:11301671-11304902  | 3232 | 3807  | 4141.39 |
| Chr6:12837371-12838522  | 1152 | 22789 | 24790.7 |
| Chr6:13330471-13330581  | 111  | 8032  | 8737.5  |
| Chr6:13427985-13432522  | 4538 | 10439 | 11355.9 |
| Chr6:25366417-25367331  | 915  | 9748  | 10604.2 |
| Chr6:25428066-25428776  | 711  | 2365  | 2572.73 |
| Chr6:27806584-27808759  | 2176 | 2943  | 3201.5  |
| Chr6:29377008-29380144  | 3137 | 8271  | 8997.5  |
| Chr7:4348764-4353078    | 4315 | 4637  | 5044.3  |
| Chr7:4373862-4376239    | 2378 | 4095  | 4454.69 |
| Chr7:8295416-8298545    | 3130 | 2651  | 2883.86 |
| Chr7:12756071-12756150  | 80   | 3409  | 3708.44 |
| Chr7:15987454-15990559  | 3106 | 2322  | 2525.96 |
| Chr7:20909518-20911172  | 1655 | 1983  | 2157.18 |
| Chr7:21303225-21305661  | 2437 | 2684  | 2919.75 |
| Chr7:21306172-21307790  | 1619 | 2392  | 2602.11 |
| Chr8:7767690-7769893    | 2204 | 3225  | 3508.27 |
| Chr8:10495239-10499777  | 4539 | 5837  | 6349.7  |
| Chr8:15453536-15462092  | 8557 | 14941 | 16253.4 |
| Chr8:17681948-17684640  | 2693 | 20485 | 22284.3 |
| Chr8:20899838-20900339  | 502  | 9083  | 9880.82 |
| Chr9:13621908-13624578  | 2671 | 11886 | 12930   |
| Chr9:16723863-16726352  | 2490 | 7656  | 8328.48 |

# Bill-siRNA clusters in egg cell

| Region                 | Length | egg cell-R1_reads | egg cell-R2_reads | egg cell-R1_RPTM | egg cell-R2_RPTM |
|------------------------|--------|-------------------|-------------------|------------------|------------------|
| Chr1:2522950-2523954   | 1005   | 4726              | 4788              | 6833.04          | 5751.93          |
| Chr1:2555829-2559377   | 3549   | 14865             | 26180             | 21492.4          | 31450.6          |
| Chr1:9040092-9043499   | 3408   | 8061              | 10931             | 11654.9          | 13131.6          |
| Chr1:9436970-9439961   | 2992   | 17685             | 20722             | 25569.7          | 24893.8          |
| Chr1:10923006-10924104 | 1099   | 2326              | 4209              | 3363.03          | 5056.36          |
| Chr1:10924312-10925048 | 737    | 2648              | 2286              | 3828.59          | 2746.22          |
| Chr1:10925194-10927397 | 2204   | 11318             | 11145             | 16364            | 13388.7          |
| Chr1:11189946-11190873 | 928    | 6723              | 8624              | 9720.39          | 10360.2          |
| Chr1:11197266-11199494 | 2229   | 10195             | 9524              | 14740.3          | 11441.4          |
| Chr1:11361738-11363092 | 1355   | 4979              | 5800              | 7198.84          | 6967.67          |
| Chr1:11363203-11364288 | 1086   | 8886              | 16517             | 12847.7          | 19842.2          |
| Chr1:11470883-11473390 | 2508   | 13792             | 17839             | 19941            | 21430.4          |
| Chr1:11473902-11475185 | 1284   | 1399              | 1683              | 2022.73          | 2021.82          |
| Chr1:12142417-12144054 | 1638   | 6182              | 8011              | 8938.19          | 9623.79          |
| Chr1:14333578-14334046 | 469    | 1173              | 2157              | 1695.97          | 2591.25          |
| Chr1:14334352-14335941 | 1590   | 8856              | 9844              | 12804.4          | 11825.8          |
| Chr1:14336432-14336941 | 510    | 8351              | 7371              | 12074.2          | 8854.94          |
| Chr1:14337055-14339725 | 2671   | 20107             | 20787             | 29071.5          | 24971.9          |
| Chr1:14960897-14961724 | 828    | 5880              | 7227              | 8501.54          | 8681.95          |
| Chr1:20810478-20811091 | 614    | 2338              | 656               | 3380.38          | 788.067          |
| Chr1:21009371-21009848 | 478    | 755               | 2475              | 1091.61          | 2973.27          |
| Chr1:25252473-25253744 | 1272   | 3509              | 5305              | 5073.45          | 6373.01          |
| Chr1:25311930-25312933 | 1004   | 10530             | 11196             | 15224.7          | 13450            |
| Chr1:26580979-26581884 | 906    | 3255              | 9274              | 4706.21          | 11141.1          |

|                         |      |       |       |         |         |
|-------------------------|------|-------|-------|---------|---------|
| Chr1:28200989-28203198  | 2210 | 9104  | 11205 | 13162.9 | 13460.8 |
| Chr1:28204077-28206320  | 2244 | 9471  | 15498 | 13693.6 | 18618.1 |
| Chr1:28212263-28214868  | 2606 | 9027  | 12893 | 13051.6 | 15488.6 |
| Chr1:29053819-29055157  | 1339 | 5335  | 7400  | 7713.56 | 8889.78 |
| Chr1:30809420-30809877  | 458  | 1469  | 2335  | 2123.94 | 2805.09 |
| Chr1:38451891-38452661  | 771  | 3087  | 4872  | 4463.31 | 5852.84 |
| Chr10:402640-402983     | 344  | 2216  | 2079  | 3203.98 | 2497.55 |
| Chr10:403437-404183     | 747  | 1599  | 1957  | 2311.9  | 2350.99 |
| Chr10:707103-708021     | 919  | 2835  | 2983  | 4098.96 | 3583.54 |
| Chr10:708360-710346     | 1987 | 7537  | 13322 | 10897.3 | 16004   |
| Chr10:5928572-5929230   | 659  | 1485  | 3082  | 2147.07 | 3702.47 |
| Chr10:5929396-5930428   | 1033 | 9237  | 18827 | 13355.2 | 22617.3 |
| Chr10:5930578-5932403   | 1826 | 5800  | 9652  | 8385.88 | 11595.2 |
| Chr10:5932575-5933433   | 859  | 1358  | 1804  | 1963.45 | 2167.18 |
| Chr10:5933640-5934228   | 589  | 2975  | 3615  | 4301.38 | 4342.78 |
| Chr10:15987538-15989571 | 2034 | 11737 | 13576 | 16969.8 | 16309.1 |
| Chr10:15989724-15991243 | 1520 | 5925  | 10845 | 8566.61 | 13028.3 |
| Chr10:16004591-16005109 | 519  | 1348  | 1832  | 1948.99 | 2200.82 |
| Chr10:16005560-16006254 | 695  | 3380  | 3252  | 4886.94 | 3906.7  |
| Chr10:20777395-20778647 | 1253 | 26912 | 24909 | 38910.5 | 29923.7 |
| Chr11:3230496-3231673   | 1178 | 7337  | 8912  | 10608.1 | 10706.2 |
| Chr11:7732371-7734499   | 2129 | 13395 | 17827 | 19367   | 21416   |
| Chr11:7737199-7738621   | 1423 | 3485  | 5942  | 5038.75 | 7138.25 |
| Chr11:7739200-7740174   | 975  | 2880  | 3809  | 4164.02 | 4575.83 |
| Chr11:7740288-7741683   | 1396 | 15002 | 18459 | 21690.5 | 22175.2 |
| Chr11:16332411-16334505 | 2095 | 13438 | 17857 | 19429.2 | 21452   |
| Chr11:16334619-16336288 | 1670 | 5588  | 7168  | 8079.36 | 8611.07 |
| Chr11:17165586-17168390 | 2805 | 9818  | 13279 | 14195.3 | 15952.4 |
| Chr11:17168610-17169447 | 838  | 2277  | 1559  | 3292.18 | 1872.86 |
| Chr11:20707192-20707759 | 568  | 2756  | 4520  | 3984.74 | 5429.97 |
| Chr11:22340361-22342289 | 1929 | 2614  | 5209  | 3779.43 | 6257.69 |
| Chr11:27017983-27018652 | 670  | 1294  | 2713  | 1870.92 | 3259.19 |
| Chr12:4730656-4732631   | 1976 | 10010 | 12007 | 14472.9 | 14424.3 |
| Chr12:4732744-4736294   | 3551 | 11696 | 16271 | 16910.6 | 19546.7 |
| Chr12:4736472-4737252   | 781  | 2312  | 3480  | 3342.78 | 4180.6  |
| Chr12:4899631-4901143   | 1513 | 10440 | 12813 | 15094.6 | 15392.5 |
| Chr12:4901316-4901606   | 291  | 1964  | 1059  | 2839.63 | 1272.2  |
| Chr12:4912418-4916123   | 3706 | 7116  | 12651 | 10288.6 | 15197.9 |
| Chr12:9064216-9066039   | 1824 | 11450 | 17030 | 16554.9 | 20458.5 |
| Chr12:17500856-17503815 | 2960 | 10579 | 16080 | 15295.5 | 19317.3 |
| Chr12:17986373-17987071 | 699  | 779   | 2801  | 1126.31 | 3364.9  |
| Chr12:17987560-17988617 | 1058 | 1423  | 2481  | 2057.43 | 2980.48 |
| Chr12:18864100-18866181 | 2082 | 13106 | 17062 | 18949.2 | 20497   |
| Chr12:24728425-24731900 | 3476 | 34136 | 44835 | 49355.2 | 53861.3 |
| Chr12:24732062-24733391 | 1330 | 2054  | 3461  | 2969.76 | 4157.77 |
| Chr2:5903234-5906580    | 3347 | 26156 | 31216 | 37817.4 | 37500.5 |
| Chr2:6760060-6761418    | 1359 | 2976  | 3552  | 4302.82 | 4267.1  |
| Chr2:6795727-6796808    | 1082 | 2782  | 7058  | 4022.33 | 8478.93 |
| Chr2:7606384-7607452    | 1069 | 1928  | 2601  | 2787.58 | 3124.64 |
| Chr2:7607595-7608737    | 1143 | 2849  | 1682  | 4119.2  | 2020.62 |
| Chr2:8343889-8345013    | 1125 | 3414  | 8712  | 4936.1  | 10465.9 |
| Chr2:13582025-13586312  | 4288 | 25208 | 35415 | 36446.7 | 42544.8 |
| Chr2:19282892-19283498  | 607  | 1812  | 3713  | 2619.86 | 4460.51 |
| Chr2:19469510-19470847  | 1338 | 7337  | 14268 | 10608.1 | 17140.5 |
| Chr2:29633288-29635396  | 2109 | 8877  | 12356 | 12834.7 | 14843.5 |
| Chr2:29635511-29635720  | 210  | 1233  | 2412  | 1782.72 | 2897.59 |
| Chr2:29779279-29779835  | 557  | 1563  | 1982  | 2259.85 | 2381.02 |
| Chr2:29781249-29782469  | 1221 | 4213  | 4070  | 6091.33 | 4889.38 |
| Chr3:7207362-7208457    | 1096 | 1457  | 2240  | 2106.59 | 2690.96 |
| Chr3:12711094-12711820  | 727  | 3514  | 1892  | 5080.68 | 2272.9  |
| Chr3:17446092-17447056  | 965  | 1512  | 3015  | 2186.11 | 3621.99 |
| Chr3:22406172-22407693  | 1522 | 4094  | 6813  | 5919.27 | 8184.61 |
| Chr3:22407803-22408245  | 443  | 3207  | 1477  | 4636.81 | 1774.35 |
| Chr3:22408374-22410031  | 1658 | 9996  | 14958 | 14452.6 | 17969.4 |
| Chr3:24567201-24568605  | 1405 | 1547  | 1767  | 2236.72 | 2122.74 |
| Chr3:24568877-24569967  | 1091 | 2032  | 1582  | 2937.95 | 1900.49 |
| Chr3:24570108-24571360  | 1253 | 8992  | 9699  | 13001   | 11651.6 |
| Chr3:24571486-24572742  | 1257 | 3243  | 1347  | 4688.86 | 1618.18 |
| Chr3:24603917-24604988  | 1072 | 3840  | 3373  | 5552.03 | 4052.06 |
| Chr3:26123815-26125355  | 1541 | 4064  | 6296  | 5875.9  | 7563.52 |
| Chr3:27619566-27620339  | 774  | 4519  | 7518  | 6533.75 | 9031.54 |
| Chr3:27620449-27620718  | 270  | 1615  | 1956  | 2335.03 | 2349.79 |
| Chr3:29752343-29753108  | 766  | 1120  | 2377  | 1619.34 | 2855.54 |
| Chr4:19682734-19683565  | 832  | 1861  | 1766  | 2690.71 | 2121.53 |
| Chr4:20353634-20354745  | 1112 | 3432  | 5432  | 4962.12 | 6525.58 |
| Chr4:35050627-35052675  | 2049 | 6060  | 13031 | 8761.79 | 15654.4 |
| Chr5:1135610-1136163    | 554  | 1664  | 1636  | 2405.88 | 1965.36 |
| Chr5:1136682-1138058    | 1377 | 5494  | 8078  | 7943.45 | 9704.28 |
| Chr5:1681798-1682999    | 1202 | 8668  | 7282  | 12532.5 | 8748.03 |
| Chr5:4826745-4827921    | 1177 | 4936  | 5945  | 7136.67 | 7141.86 |
| Chr5:4828081-4829668    | 1588 | 3896  | 6086  | 5632.99 | 7311.24 |
| Chr5:10917881-10920093  | 2213 | 6050  | 6815  | 8747.34 | 8187.01 |
| Chr5:10920672-10921539  | 868  | 878   | 3720  | 1269.45 | 4468.92 |
| Chr5:11242587-11245267  | 2681 | 17267 | 17846 | 24965.3 | 21438.8 |
| Chr5:11245732-11246565  | 834  | 1700  | 2930  | 2457.93 | 3519.87 |
| Chr5:16055522-16056984  | 1463 | 4339  | 5368  | 6273.5  | 6448.7  |
| Chr5:25353784-25354107  | 324  | 1622  | 3193  | 2345.15 | 3835.82 |
| Chr5:25354293-25356551  | 2259 | 20009 | 19150 | 28929.8 | 23005.3 |



|                        |      |       |       |         |         |
|------------------------|------|-------|-------|---------|---------|
| Chr5:26873017-26874190 | 1174 | 3240  | 4279  | 4684.52 | 5140.46 |
| Chr6:6077897-6080386   | 2490 | 16069 | 18224 | 23233.2 | 21892.9 |
| Chr6:7535831-7536909   | 1079 | 1892  | 2189  | 2735.53 | 2629.69 |
| Chr6:7537014-7537622   | 609  | 6839  | 7519  | 9888.1  | 9032.74 |
| Chr6:7538323-7539394   | 1072 | 1866  | 3147  | 2697.94 | 3780.56 |
| Chr6:11301685-11304877 | 3193 | 24664 | 31894 | 35660.2 | 38315   |
| Chr6:13426951-13427609 | 659  | 5660  | 4824  | 8183.46 | 5795.18 |
| Chr6:13427912-13430860 | 2949 | 22245 | 29534 | 32162.7 | 35479.8 |
| Chr6:13430970-13432240 | 1271 | 2369  | 2155  | 3425.2  | 2588.85 |
| Chr6:16892428-16893253 | 826  | 2106  | 963   | 3044.94 | 1156.87 |
| Chr6:17674091-17674798 | 708  | 1756  | 1814  | 2538.9  | 2179.2  |
| Chr6:19710389-19711766 | 1378 | 1145  | 3178  | 1655.49 | 3817.8  |
| Chr6:20384471-20384850 | 380  | 1967  | 2013  | 2843.97 | 2418.26 |
| Chr6:21225678-21227227 | 1550 | 2745  | 3824  | 3968.83 | 4593.85 |
| Chr6:27802387-27803890 | 1504 | 2129  | 3009  | 3078.19 | 3614.78 |
| Chr6:27805460-27806391 | 932  | 4687  | 6784  | 6776.65 | 8149.77 |
| Chr6:27807201-27807559 | 359  | 2777  | 1775  | 4015.1  | 2132.35 |
| Chr6:27807727-27808889 | 1163 | 3774  | 3936  | 5456.6  | 4728.4  |
| Chr6:28516353-28517472 | 1120 | 4112  | 7372  | 5945.3  | 8856.14 |
| Chr6:28517577-28517890 | 314  | 1759  | 3153  | 2543.23 | 3787.77 |
| Chr6:29377012-29380350 | 3339 | 38442 | 53543 | 55581   | 64322.4 |
| Chr7:999852-1000769    | 918  | 2068  | 1074  | 2990    | 1290.22 |
| Chr7:4349415-4352710   | 3296 | 26302 | 38171 | 38028.5 | 45855.7 |
| Chr7:4373867-4375891   | 2025 | 7866  | 8865  | 11373   | 10649.7 |
| Chr7:8296498-8297585   | 1088 | 6463  | 8564  | 9344.47 | 10288.1 |
| Chr7:15677012-15677890 | 879  | 4108  | 6106  | 5939.51 | 7335.27 |
| Chr7:15714989-15715711 | 723  | 2389  | 3085  | 3454.11 | 3706.08 |
| Chr7:15988106-15990391 | 2286 | 3681  | 4983  | 5322.14 | 5986.19 |
| Chr7:20002141-20002806 | 666  | 3256  | 5696  | 4707.66 | 6842.73 |
| Chr7:24243640-24243673 | 34   | 2276  | 2404  | 3290.73 | 2887.98 |
| Chr7:26333237-26333261 | 25   | 3882  | 1270  | 5612.75 | 1525.68 |
| Chr8:5778355-5779406   | 1052 | 1842  | 2964  | 2663.24 | 3560.72 |
| Chr8:7667731-7668633   | 903  | 2722  | 1811  | 3935.58 | 2175.59 |
| Chr8:7767913-7768467   | 555  | 1231  | 2880  | 1779.83 | 3459.81 |
| Chr8:7768631-7769265   | 635  | 2075  | 1797  | 3000.12 | 2158.78 |
| Chr8:7991188-7991898   | 711  | 2000  | 1476  | 2891.68 | 1773.15 |
| Chr8:9445368-9447251   | 1884 | 8798  | 7822  | 12720.5 | 9396.74 |
| Chr8:10495804-10497082 | 1279 | 2651  | 2510  | 3832.92 | 3015.32 |
| Chr8:10497183-10497715 | 533  | 2867  | 2755  | 4145.22 | 3309.64 |
| Chr8:10498104-10499006 | 903  | 1609  | 4455  | 2326.36 | 5351.89 |
| Chr8:15455335-15458898 | 3564 | 21966 | 34086 | 31759.3 | 40948.3 |
| Chr8:15459018-15462222 | 3205 | 25805 | 32779 | 37309.9 | 39378.1 |
| Chr8:16976766-16978189 | 1424 | 3484  | 3550  | 5037.31 | 4264.69 |
| Chr8:20981399-20983484 | 2086 | 7629  | 8878  | 11030.3 | 10665.3 |
| Chr8:21691538-21694272 | 2735 | 8081  | 10269 | 11683.8 | 12336.4 |
| Chr8:27145500-27146791 | 1292 | 2058  | 2817  | 2975.54 | 3384.12 |
| Chr9:1293771-1295052   | 1282 | 3580  | 3650  | 5176.11 | 4384.82 |
| Chr9:1295658-1296838   | 1181 | 5072  | 6749  | 7333.3  | 8107.72 |
| Chr9:1297039-1297441   | 403  | 1840  | 2829  | 2660.35 | 3398.54 |
| Chr9:3228857-3229750   | 894  | 1549  | 3611  | 2239.61 | 4337.97 |
| Chr9:3229904-3230932   | 1029 | 2311  | 3798  | 3341.34 | 4562.62 |
| Chr9:3515553-3516049   | 497  | 2491  | 3113  | 3601.59 | 3739.71 |
| Chr9:12420612-12422305 | 1694 | 2113  | 4114  | 3055.06 | 4942.24 |
| Chr9:15228668-15229487 | 820  | 3397  | 2397  | 4911.52 | 2879.57 |
| Chr9:15230413-15231047 | 635  | 1989  | 2375  | 2875.78 | 2853.14 |
| Chr9:16724057-16726642 | 2586 | 12227 | 16418 | 17678.3 | 19723.3 |

#### Bill-siRNA clusters in ovary without the egg cell

| Region                 | Length | ovary without the egg cell-R1_reads | ovary without the egg cell-R2_reads | ovary without the egg cell-R1_RPTM | ovary without the egg cell-R2_RPTM |
|------------------------|--------|-------------------------------------|-------------------------------------|------------------------------------|------------------------------------|
| Chr1:2521732-2523864   | 2133   | 25792                               | 27713                               | 12743.7                            | 12906.4                            |
| Chr1:2555230-2559488   | 4259   | 117278                              | 121959                              | 57946.3                            | 56798.3                            |
| Chr1:9039469-9044839   | 5371   | 99102                               | 104707                              | 48965.7                            | 48763.8                            |
| Chr1:9436039-9441447   | 5409   | 127699                              | 134266                              | 63095.3                            | 62529.9                            |
| Chr1:10922454-10924142 | 1689   | 19058                               | 19364                               | 9416.44                            | 9018.14                            |
| Chr1:10924269-10928133 | 3865   | 94029                               | 102110                              | 46459.1                            | 47554.3                            |
| Chr1:11187953-11189724 | 1772   | 4081                                | 4418                                | 2016.4                             | 2057.54                            |
| Chr1:11189849-11190961 | 1113   | 26810                               | 28074                               | 13246.7                            | 13074.5                            |
| Chr1:11194472-11200782 | 6311   | 85568                               | 89910                               | 42278.6                            | 41872.6                            |
| Chr1:11360842-11365015 | 4174   | 125122                              | 131850                              | 61822                              | 61404.8                            |
| Chr1:11468957-11470040 | 1084   | 4341                                | 4446                                | 2144.86                            | 2070.58                            |
| Chr1:11470426-11476572 | 6147   | 124839                              | 136202                              | 61682.2                            | 63431.5                            |
| Chr1:12141609-12145052 | 3444   | 42954                               | 45332                               | 21223.3                            | 21111.9                            |
| Chr1:14333307-14340220 | 6914   | 239314                              | 254048                              | 118244                             | 118314                             |
| Chr1:14959357-14963605 | 4249   | 31559                               | 33786                               | 15593.1                            | 15734.7                            |
| Chr1:16172286-16175087 | 2802   | 5397                                | 5412                                | 2666.62                            | 2520.46                            |
| Chr1:20809793-20814418 | 4626   | 22562                               | 23360                               | 11147.7                            | 10879.1                            |
| Chr1:21008411-21013112 | 4702   | 20818                               | 22323                               | 10286                              | 10396.2                            |
| Chr1:25251535-25254062 | 2528   | 18455                               | 19004                               | 9118.5                             | 8850.48                            |
| Chr1:25311931-25313593 | 1663   | 46192                               | 49745                               | 22823.2                            | 23167.1                            |
| Chr1:26580919-26582394 | 1476   | 14889                               | 15190                               | 7356.56                            | 7074.24                            |
| Chr1:28199338-28208011 | 8674   | 145728                              | 154552                              | 72003.3                            | 71977.5                            |
| Chr1:28209610-28215997 | 6388   | 87100                               | 91800                               | 43035.6                            | 42752.8                            |

|                         |      |        |        |         |         |
|-------------------------|------|--------|--------|---------|---------|
| Chr1:29053251-29056279  | 3029 | 39794  | 42304  | 19662   | 19701.7 |
| Chr1:30808356-30812188  | 3833 | 19972  | 21713  | 9868.04 | 10112.1 |
| Chr1:38451520-38453329  | 1810 | 7283   | 7522   | 3598.48 | 3503.12 |
| Chr1:39322744-39324043  | 1300 | 4622   | 4329   | 2283.7  | 2016.09 |
| Chr10:401896-404258     | 2363 | 14738  | 15692  | 7281.95 | 7308.03 |
| Chr10:707091-710421     | 3331 | 73556  | 78365  | 36343.6 | 36495.9 |
| Chr10:3442273-3445803   | 3531 | 15044  | 16629  | 7433.14 | 7744.4  |
| Chr10:5680286-5681100   | 815  | 4064   | 4552   | 2008    | 2119.94 |
| Chr10:5927422-5933485   | 6064 | 139501 | 148796 | 68926.6 | 69296.8 |
| Chr10:5933589-5934237   | 649  | 12298  | 13223  | 6076.36 | 6158.17 |
| Chr10:11208741-11212837 | 4097 | 6272   | 6474   | 3098.96 | 3015.05 |
| Chr10:15986188-15991421 | 5234 | 96484  | 100871 | 47672.1 | 46977.3 |
| Chr10:16004085-16005176 | 1092 | 8536   | 9111   | 4217.58 | 4243.15 |
| Chr10:16005552-16007432 | 1881 | 31814  | 35343  | 15719.1 | 16459.8 |
| Chr10:20777019-20779416 | 2398 | 113607 | 121578 | 56132.5 | 56620.9 |
| Chr11:2541243-2543960   | 2718 | 11251  | 11590  | 5559.05 | 5397.66 |
| Chr11:3229550-3232287   | 2738 | 67343  | 70309  | 33273.7 | 32744.1 |
| Chr11:7728254-7730775   | 2522 | 5204   | 5363   | 2571.26 | 2497.64 |
| Chr11:7730927-7734524   | 3598 | 117447 | 124976 | 58029.8 | 58203.4 |
| Chr11:7734625-7738644   | 4020 | 35328  | 37162  | 17455.3 | 17307   |
| Chr11:7738747-7741713   | 2967 | 95366  | 100039 | 47119.7 | 46589.8 |
| Chr11:7741872-7742581   | 710  | 5111   | 5383   | 2525.31 | 2506.95 |
| Chr11:8911397-8913713   | 2317 | 8341   | 8805   | 4121.24 | 4100.64 |
| Chr11:9698554-9701870   | 3317 | 5151   | 5230   | 2545.08 | 2435.7  |
| Chr11:15465328-15468157 | 2830 | 4817   | 5358   | 2380.05 | 2495.31 |
| Chr11:16330812-16332117 | 1306 | 7926   | 8130   | 3916.19 | 3786.28 |
| Chr11:16332244-16336650 | 4407 | 182633 | 195401 | 90237.8 | 91001.5 |
| Chr11:17164417-17170500 | 6084 | 60600  | 64927  | 29942.1 | 30237.6 |
| Chr11:19254502-19256108 | 1607 | 6605   | 6951   | 3263.49 | 3237.2  |
| Chr11:20707158-20709525 | 2368 | 22795  | 23395  | 11262.9 | 10895.4 |
| Chr11:22336837-22342925 | 6089 | 25588  | 27563  | 12642.9 | 12836.6 |
| Chr11:26270584-26272400 | 1817 | 11338  | 12645  | 5602.03 | 5888.99 |
| Chr11:27016958-27019330 | 2373 | 13644  | 14267  | 6741.41 | 6644.38 |
| Chr12:4729317-4736344   | 7028 | 179194 | 190803 | 88538.6 | 88860.1 |
| Chr12:4736450-4737273   | 824  | 24049  | 26477  | 11882.5 | 12330.8 |
| Chr12:4737375-4738238   | 864  | 6536   | 6957   | 3229.4  | 3239.99 |
| Chr12:4898892-4904926   | 6035 | 79496  | 82498  | 39278.5 | 38420.7 |
| Chr12:4912031-4918086   | 6056 | 71321  | 78018  | 35239.3 | 36334.3 |
| Chr12:5024509-5027632   | 3124 | 5964   | 6040   | 2946.77 | 2812.93 |
| Chr12:9062955-9066535   | 3581 | 42003  | 45331  | 20753.4 | 21111.4 |
| Chr12:17500242-17505707 | 5466 | 92036  | 97679  | 45474.4 | 45490.7 |
| Chr12:17984344-17989083 | 4740 | 49369  | 51788  | 24392.9 | 24118.5 |
| Chr12:18861253-18866953 | 5701 | 58469  | 60505  | 28889.2 | 28178.2 |
| Chr12:19232994-19236259 | 3266 | 10611  | 11316  | 5242.83 | 5270.05 |
| Chr12:21104064-21108755 | 4692 | 17841  | 18604  | 8815.12 | 8664.19 |
| Chr12:23677972-23679294 | 1323 | 9121   | 10066  | 4506.63 | 4687.9  |
| Chr12:24727729-24734587 | 6859 | 245861 | 261174 | 121478  | 121633  |
| Chr2:1371636-1372683    | 1048 | 4034   | 4433   | 1993.17 | 2064.52 |
| Chr2:3700044-3702409    | 2366 | 5538   | 6218   | 2736.29 | 2895.83 |
| Chr2:5901327-5907223    | 5897 | 184012 | 193662 | 90919.2 | 90191.6 |
| Chr2:6759591-6763892    | 4302 | 34240  | 36178  | 16917.8 | 16848.7 |
| Chr2:6795192-6797025    | 1834 | 31811  | 33256  | 15717.6 | 15487.9 |
| Chr2:6797249-6798333    | 1085 | 14218  | 14342  | 7025.02 | 6679.31 |
| Chr2:7604912-7609291    | 4380 | 49521  | 52816  | 24468   | 24597.3 |
| Chr2:8343847-8349482    | 5636 | 58777  | 59609  | 29041.3 | 27760.9 |
| Chr2:13139422-13139605  | 184  | 9032   | 10693  | 4462.65 | 4979.91 |
| Chr2:13580566-13587717  | 7152 | 166166 | 177286 | 82101.6 | 82565.1 |
| Chr2:14731925-14734996  | 3072 | 4658   | 4733   | 2301.49 | 2204.24 |
| Chr2:19282158-19285083  | 2926 | 20127  | 22437  | 9944.62 | 10449.3 |
| Chr2:19469359-19471985  | 2627 | 85198  | 90752  | 42095.8 | 42264.7 |
| Chr2:29632213-29635840  | 3628 | 33514  | 35512  | 16559.1 | 16538.5 |
| Chr2:29778338-29779853  | 1516 | 8168   | 8306   | 4035.76 | 3868.24 |
| Chr2:29780011-29782774  | 2764 | 28809  | 31013  | 14234.3 | 14443.3 |
| Chr2:33666809-33669145  | 2337 | 5582   | 6427   | 2758.03 | 2993.16 |
| Chr3:7204980-7209458    | 4479 | 9794   | 10801  | 4839.15 | 5030.21 |
| Chr3:10131626-10135220  | 3595 | 5586   | 6749   | 2760.01 | 3143.12 |
| Chr3:12710048-12712968  | 2921 | 14962  | 15140  | 7392.63 | 7050.95 |
| Chr3:15609540-15613989  | 4450 | 9495   | 9515   | 4691.42 | 4431.29 |
| Chr3:16165123-16166316  | 1194 | 6870   | 7083   | 3394.42 | 3298.67 |
| Chr3:16790754-16793684  | 2931 | 11280  | 11636  | 5573.38 | 5419.08 |
| Chr3:17443800-17448110  | 4311 | 8285   | 8643   | 4093.57 | 4025.19 |
| Chr3:19353012-19356617  | 3606 | 5957   | 6547   | 2943.32 | 3049.05 |
| Chr3:20789900-20793672  | 3773 | 12978  | 13437  | 6412.35 | 6257.84 |
| Chr3:22294438-22296091  | 1654 | 5391   | 6088   | 2663.66 | 2835.28 |
| Chr3:22402927-22411016  | 8090 | 125392 | 133733 | 61955.4 | 62281.7 |
| Chr3:24566476-24573767  | 7292 | 114465 | 120698 | 56556.4 | 56211.1 |
| Chr3:24601609-24605533  | 3925 | 44726  | 46800  | 22098.8 | 21795.5 |
| Chr3:26122885-26129251  | 6367 | 46363  | 50210  | 22907.7 | 23383.6 |
| Chr3:26143572-26144672  | 1101 | 8143   | 8396   | 4023.4  | 3910.16 |
| Chr3:27618891-27621672  | 2782 | 54256  | 56062  | 26807.5 | 26109   |
| Chr3:28509601-28511671  | 2071 | 11802  | 13043  | 5831.29 | 6074.34 |
| Chr3:29748836-29751620  | 2785 | 7512   | 7831   | 3711.63 | 3647.03 |
| Chr3:29751734-29754695  | 2962 | 21294  | 22183  | 10521.2 | 10331   |
| Chr4:11651843-11656585  | 4743 | 12867  | 14059  | 6357.5  | 6547.51 |
| Chr4:19682184-19684644  | 2461 | 20203  | 21938  | 9982.17 | 10216.9 |
| Chr4:20353577-20355903  | 2327 | 12826  | 12878  | 6337.25 | 5997.5  |
| Chr4:23338306-23340568  | 2263 | 5438   | 5682   | 2686.88 | 2646.2  |
| Chr4:27933005-27934489  | 1485 | 5932   | 6474   | 2930.96 | 3015.05 |

|                        |       |        |        |         |         |
|------------------------|-------|--------|--------|---------|---------|
| Chr4:35050584-35053521 | 2938  | 85988  | 89688  | 42486.1 | 41769.2 |
| Chr5:661691-664101     | 2411  | 9504   | 9830   | 4695.87 | 4578    |
| Chr5:1134949-1136537   | 1589  | 10082  | 9930   | 4981.45 | 4624.57 |
| Chr5:1136676-1140186   | 3511  | 45340  | 48572  | 22402.2 | 22620.8 |
| Chr5:1680136-1683572   | 3437  | 28844  | 30197  | 14251.6 | 14063.2 |
| Chr5:2481362-2481985   | 624   | 6976   | 7499   | 3446.8  | 3492.41 |
| Chr5:2775827-2775910   | 84    | 5699   | 5769   | 2815.84 | 2686.72 |
| Chr5:4826150-4827939   | 1790  | 21199  | 23453  | 10474.3 | 10922.5 |
| Chr5:4828053-4831638   | 3586  | 25460  | 26847  | 12579.6 | 12503.1 |
| Chr5:10917366-10922456 | 5091  | 68917  | 70303  | 34051.5 | 32741.3 |
| Chr5:11241193-11247100 | 5908  | 132179 | 140517 | 65308.8 | 65441.1 |
| Chr5:16053876-16057988 | 4113  | 26728  | 27831  | 13206.1 | 12961.4 |
| Chr5:19883443-19885047 | 1605  | 4851   | 5651   | 2396.85 | 2631.77 |
| Chr5:25352931-25357226 | 4296  | 139747 | 146788 | 69048.1 | 68361.6 |
| Chr5:26872169-26874574 | 2406  | 27974  | 29986  | 13821.8 | 13965   |
| Chr5:27488831-27490515 | 1685  | 9545   | 9961   | 4716.12 | 4639    |
| Chr6:1020770-1023328   | 2559  | 4717   | 5171   | 2330.64 | 2408.22 |
| Chr6:1050396-1053374   | 2979  | 5912   | 6909   | 2921.08 | 3217.64 |
| Chr6:6073665-6081727   | 8063  | 96037  | 101091 | 47451.3 | 47079.8 |
| Chr6:7378759-7383285   | 4527  | 10260  | 11250  | 5069.4  | 5239.31 |
| Chr6:7535649-7541170   | 5522  | 93699  | 98122  | 46296.1 | 45697.1 |
| Chr6:11301673-11305097 | 3425  | 161179 | 173127 | 79637.5 | 80628.1 |
| Chr6:13425328-13433837 | 8510  | 196334 | 213137 | 97007.4 | 99261.5 |
| Chr6:13434156-13438338 | 4183  | 5645   | 5751   | 2789.16 | 2678.34 |
| Chr6:17320147-17322325 | 2179  | 8080   | 8970   | 3992.28 | 4177.48 |
| Chr6:17673998-17677275 | 3278  | 8734   | 9993   | 4315.41 | 4653.91 |
| Chr6:18069265-18071348 | 2084  | 8028   | 8048   | 3966.58 | 3748.09 |
| Chr6:19709920-19715677 | 5758  | 21992  | 21816  | 10866.1 | 10160.1 |
| Chr6:20383589-20385536 | 1948  | 8648   | 8374   | 4272.92 | 3899.91 |
| Chr6:21225648-21227449 | 1802  | 12728  | 13559  | 6288.82 | 6314.65 |
| Chr6:27799303-27806512 | 7210  | 65115  | 69406  | 32172.9 | 32323.5 |
| Chr6:27806630-27809096 | 2467  | 43843  | 47357  | 21662.5 | 22054.9 |
| Chr6:28515521-28519245 | 3725  | 40263  | 43457  | 19893.7 | 20238.7 |
| Chr6:29372555-29380618 | 8064  | 239188 | 257689 | 118181  | 120010  |
| Chr7:864861-866126     | 1266  | 4254   | 4704   | 2101.87 | 2190.73 |
| Chr7:996428-1000991    | 4564  | 13950  | 14861  | 6892.61 | 6921.02 |
| Chr7:4348717-4353086   | 4370  | 160150 | 171141 | 79129.1 | 79703.2 |
| Chr7:4372306-4376897   | 4592  | 70049  | 74399  | 34610.8 | 34648.9 |
| Chr7:6414208-6415841   | 1634  | 8167   | 7708   | 4035.26 | 3589.74 |
| Chr7:6988035-6988932   | 898   | 5105   | 5565   | 2522.35 | 2591.71 |
| Chr7:8295276-8300948   | 5673  | 62364  | 66253  | 30813.7 | 30855.1 |
| Chr7:15676149-15678935 | 2787  | 23479  | 23957  | 11600.8 | 11157.2 |
| Chr7:15713035-15717883 | 4849  | 33304  | 35289  | 16455.3 | 16434.7 |
| Chr7:15986539-15990993 | 4455  | 42495  | 44284  | 20996.5 | 20623.8 |
| Chr7:16064531-16066301 | 1771  | 4387   | 4321   | 2167.59 | 2012.36 |
| Chr7:18498538-18501295 | 2758  | 6141   | 6407   | 3034.23 | 2983.85 |
| Chr7:19998919-20004643 | 5725  | 27779  | 29229  | 13725.4 | 13612.4 |
| Chr7:23520036-23521984 | 1949  | 11359  | 12752  | 5612.41 | 5938.82 |
| Chr7:27168790-27170489 | 1700  | 10326  | 10932  | 5102.01 | 5091.22 |
| Chr7:28997880-28999201 | 1322  | 4914   | 5181   | 2427.98 | 2412.88 |
| Chr8:5775724-5778224   | 2501  | 10691  | 11743  | 5282.36 | 5468.91 |
| Chr8:5778349-5780487   | 2139  | 27402  | 30700  | 13539.2 | 14297.5 |
| Chr8:7666904-7671942   | 5039  | 27089  | 28536  | 13384.5 | 13289.7 |
| Chr8:7765914-7767565   | 1652  | 10041  | 11277  | 4961.19 | 5251.89 |
| Chr8:7767691-7772582   | 4892  | 50567  | 53633  | 24984.8 | 24977.8 |
| Chr8:7989823-7992612   | 2790  | 8171   | 9022   | 4037.24 | 4201.7  |
| Chr8:8446510-8449684   | 3175  | 5260   | 5170   | 2598.93 | 2407.76 |
| Chr8:9442911-9449183   | 6273  | 41629  | 43612  | 20568.6 | 20310.8 |
| Chr8:10491721-10499795 | 8075  | 96617  | 103145 | 47737.8 | 48036.4 |
| Chr8:15383732-15386857 | 3126  | 4612   | 5173   | 2278.76 | 2409.15 |
| Chr8:15452050-15466199 | 14150 | 362337 | 379445 | 179028  | 176714  |
| Chr8:16975293-16979494 | 4202  | 20760  | 21650  | 10257.4 | 10082.8 |
| Chr8:20979660-20986590 | 6931  | 55691  | 57924  | 27516.6 | 26976.2 |
| Chr8:21691320-21695444 | 4125  | 54903  | 56486  | 27127.2 | 26306.5 |
| Chr8:27144980-27147526 | 2547  | 24077  | 24610  | 11896.3 | 11461.3 |
| Chr9:1292302-1298579   | 6278  | 32420  | 34405  | 16018.5 | 16023   |
| Chr9:3227716-3231468   | 3753  | 28589  | 30363  | 14125.6 | 14140.6 |
| Chr9:3512136-3519406   | 7271  | 13851  | 14403  | 6843.69 | 6707.72 |
| Chr9:12177632-12184663 | 7032  | 12668  | 14221  | 6259.18 | 6622.96 |
| Chr9:12418936-12426852 | 7917  | 29988  | 31641  | 14816.9 | 14735.7 |
| Chr9:12621273-12623420 | 2148  | 12137  | 13656  | 5996.81 | 6359.83 |
| Chr9:15227970-15231916 | 3947  | 38764  | 40419  | 19153   | 18823.8 |
| Chr9:16722326-16726841 | 4516  | 100536 | 105521 | 49674.2 | 49142.9 |
| Chr9:17428605-17430531 | 1927  | 5391   | 5557   | 2663.66 | 2587.99 |

#### Bill-siRNA clusters in sperm

| Region                 | Length | sperm-R1_reads | sperm-R2_reads | sperm-R1_RPTM | sperm-R2_RPTM |
|------------------------|--------|----------------|----------------|---------------|---------------|
| Chr1:5832452-5832480   | 29     | 5350           | 6150           | 2640.2        | 2560.06       |
| Chr1:13389750-13392539 | 2790   | 98563          | 117174         | 48640.3       | 48776.1       |
| Chr1:22638789-22639134 | 346    | 20194          | 25041          | 9965.63       | 10423.8       |
| Chr1:22639312-22639986 | 675    | 25265          | 31011          | 12468.1       | 12909         |
| Chr10:4833469-4833493  | 25     | 22021          | 25793          | 10867.3       | 10736.9       |
| Chr10:4833653-4833734  | 82     | 6671           | 8866           | 3292.1        | 3690.65       |

|                         |      |       |       |         |         |
|-------------------------|------|-------|-------|---------|---------|
| Chr10:5733760-5733795   | 36   | 8784  | 11139 | 4334.86 | 4636.84 |
| Chr10:5863937-5864726   | 790  | 6078  | 7129  | 2999.46 | 2967.59 |
| Chr10:11842695-11843341 | 647  | 5847  | 6282  | 2885.46 | 2615.01 |
| Chr10:11861538-11861955 | 418  | 8629  | 11399 | 4258.37 | 4745.07 |
| Chr10:11872745-11872979 | 235  | 4313  | 6022  | 2128.44 | 2506.78 |
| Chr10:12917830-12918270 | 441  | 8877  | 13950 | 4380.75 | 5806.97 |
| Chr11:2525476-2525850   | 375  | 4500  | 6436  | 2220.73 | 2679.12 |
| Chr11:6404058-6404508   | 451  | 8499  | 7672  | 4194.21 | 3193.63 |
| Chr11:6404612-6404765   | 154  | 6847  | 7216  | 3378.96 | 3003.81 |
| Chr11:9962541-9962695   | 155  | 4005  | 5932  | 1976.45 | 2469.32 |
| Chr11:12039479-12045573 | 6095 | 7935  | 9516  | 3915.88 | 3961.23 |
| Chr11:12082057-12091313 | 9257 | 11506 | 13319 | 5678.15 | 5544.31 |
| Chr11:12091434-12098260 | 6827 | 7798  | 9409  | 3848.27 | 3916.69 |
| Chr11:12098377-12105542 | 7166 | 8366  | 10201 | 4128.58 | 4246.37 |
| Chr11:12108857-12112490 | 3634 | 4192  | 5157  | 2068.73 | 2146.71 |
| Chr11:12112628-12116000 | 3373 | 5205  | 5936  | 2568.64 | 2470.98 |
| Chr11:12117578-12122235 | 4658 | 6989  | 8787  | 3449.04 | 3657.77 |
| Chr11:12152601-12157037 | 4437 | 4827  | 6385  | 2382.1  | 2657.89 |
| Chr11:12159598-12163159 | 3562 | 4296  | 5263  | 2120.05 | 2190.83 |
| Chr11:12277524-12280220 | 2697 | 4484  | 6251  | 2212.83 | 2602.11 |
| Chr11:25567052-25567443 | 392  | 17384 | 20785 | 8578.91 | 8652.18 |
| Chr12:9355716-9356887   | 1172 | 21288 | 25103 | 10505.5 | 10449.6 |
| Chr12:10451711-10452799 | 1089 | 10719 | 12113 | 5289.77 | 5042.28 |
| Chr12:10452944-10454043 | 1100 | 7906  | 10469 | 3901.57 | 4357.93 |
| Chr12:22728962-22729161 | 200  | 6610  | 7011  | 3262    | 2918.47 |
| Chr12:22757840-22757936 | 97   | 5555  | 7987  | 2741.36 | 3324.75 |
| Chr2:6004101-6004463    | 363  | 7493  | 9655  | 3697.76 | 4019.09 |
| Chr2:6858743-6859225    | 483  | 6363  | 8911  | 3140.11 | 3709.39 |
| Chr2:7682570-7682849    | 280  | 4809  | 4883  | 2373.22 | 2032.65 |
| Chr2:11111727-11114974  | 3248 | 60839 | 62512 | 30023.7 | 26021.9 |
| Chr3:7365210-7366325    | 1116 | 8620  | 9321  | 4253.93 | 3880.06 |
| Chr3:7366446-7367619    | 1174 | 6664  | 9251  | 3288.65 | 3850.92 |
| Chr3:28646237-28646388  | 152  | 3703  | 6759  | 1827.41 | 2813.57 |
| Chr4:12225786-12225902  | 117  | 4138  | 4963  | 2042.08 | 2065.95 |
| Chr5:7442444-7444284    | 1841 | 4684  | 4898  | 2311.53 | 2038.89 |
| Chr5:8700746-8702511    | 1766 | 18620 | 20466 | 9188.87 | 8519.39 |
| Chr5:9162850-9164714    | 1865 | 8732  | 8303  | 4309.2  | 3456.29 |
| Chr5:10952586-10952876  | 291  | 4086  | 6353  | 2016.42 | 2644.57 |
| Chr5:19929254-19929538  | 285  | 4933  | 4001  | 2434.41 | 1665.5  |
| Chr5:22687899-22688158  | 260  | 12326 | 12537 | 6082.82 | 5218.78 |
| Chr6:7908551-7909362    | 812  | 6120  | 8690  | 3020.19 | 3617.39 |
| Chr6:12837394-12838523  | 1130 | 63572 | 73822 | 31372.5 | 30729.9 |
| Chr6:13330470-13330579  | 110  | 6030  | 6920  | 2975.77 | 2880.59 |
| Chr6:25366430-25367236  | 807  | 5558  | 6135  | 2742.84 | 2553.82 |
| Chr6:25428084-25428691  | 608  | 10874 | 12182 | 5366.26 | 5071.01 |
| Chr6:25516864-25517510  | 647  | 5557  | 9093  | 2742.35 | 3785.15 |
| Chr7:20909662-20911024  | 1363 | 28409 | 35936 | 14019.7 | 14959.1 |
| Chr7:26333237-26333320  | 84   | 11365 | 12283 | 5608.57 | 5113.05 |
| Chr8:808546-809249      | 704  | 10868 | 11481 | 5363.3  | 4779.2  |
| Chr8:812059-812362      | 304  | 11407 | 14497 | 5629.3  | 6034.67 |
| Chr8:7856645-7857710    | 1066 | 5883  | 3734  | 2903.23 | 1554.35 |
| Chr8:17680393-17681092  | 700  | 41804 | 64556 | 20630.1 | 26872.8 |
| Chr8:17681885-17684563  | 2679 | 73033 | 91687 | 36041.4 | 38166.6 |
| Chr8:23993800-23994189  | 390  | 4826  | 6967  | 2381.61 | 2900.16 |
| Chr9:309524-310691      | 1168 | 4016  | 5861  | 1981.88 | 2439.76 |
| Chr9:311098-312110      | 1013 | 8130  | 6558  | 4012.11 | 2729.9  |
| Chr9:3963462-3964322    | 861  | 6532  | 7057  | 3223.51 | 2937.62 |
| Chr9:10835754-10836624  | 871  | 19085 | 18591 | 9418.35 | 7738.88 |
| Chr9:10836802-10837433  | 632  | 9590  | 17086 | 4732.62 | 7112.4  |

#### Bill-siRNA clusters in vegetative cell

| Region                  | Length | vegetative cell-<br>R1_reads | vegetative cell-<br>R2_reads | vegetative cell-<br>R1_RPTM | vegetative cell-<br>R2_RPTM |
|-------------------------|--------|------------------------------|------------------------------|-----------------------------|-----------------------------|
| Chr1:13389841-13392431  | 2591   | 42874                        | 31025                        | 29271                       | 27469.8                     |
| Chr1:22638784-22639174  | 391    | 4603                         | 3124                         | 3142.56                     | 2766.01                     |
| Chr1:22639283-22640026  | 744    | 10467                        | 5700                         | 7146.04                     | 5046.82                     |
| Chr11:6403919-6404765   | 847    | 10662                        | 7119                         | 7279.17                     | 6303.22                     |
| Chr11:25567052-25567581 | 530    | 6572                         | 3772                         | 4486.84                     | 3339.76                     |
| Chr12:4730782-4736293   | 5512   | 3647                         | 2059                         | 2489.88                     | 1823.05                     |
| Chr12:9355710-9356884   | 1175   | 4451                         | 3148                         | 3038.79                     | 2787.26                     |
| Chr12:10451673-10454043 | 2371   | 3558                         | 2186                         | 2429.12                     | 1935.5                      |
| Chr2:6003909-6004485    | 577    | 5938                         | 4642                         | 4054                        | 4110.06                     |
| Chr2:11111727-11114965  | 3239   | 14248                        | 10348                        | 9727.41                     | 9162.2                      |
| Chr5:26275526-26276139  | 614    | 3588                         | 2654                         | 2449.6                      | 2349.87                     |
| Chr6:12837392-12838522  | 1131   | 20289                        | 13776                        | 13851.7                     | 12197.4                     |
| Chr6:13330468-13330579  | 112    | 4667                         | 3003                         | 3186.26                     | 2658.88                     |
| Chr6:25428029-25428706  | 678    | 4555                         | 3617                         | 3109.79                     | 3202.52                     |
| Chr7:20909511-20911196  | 1686   | 7313                         | 5629                         | 4992.74                     | 4983.96                     |
| Chr8:15455302-15462222  | 6921   | 5897                         | 3758                         | 4026                        | 3327.36                     |
| Chr8:17680076-17680964  | 889    | 4615                         | 3205                         | 3150.76                     | 2837.73                     |
| Chr8:17681903-17684574  | 2672   | 40693                        | 31218                        | 27782                       | 27640.7                     |

Bill-siRNA clusters in Nipponbare embryo

| Region                 | Length | embryo_reads | embryo_RPTM |
|------------------------|--------|--------------|-------------|
| Chr4:19715479-19715586 | 108    | 6346         | 3121.91     |
| Chr7:136115-139833     | 3719   | 15007        | 7382.67     |
| Chr8:20239410-20241532 | 2123   | 15660        | 7703.92     |
| Chr8:20243047-20245138 | 2092   | 16741        | 8235.71     |
| Chr12:9355653-9356898  | 1246   | 7987         | 3929.19     |

Bill-siRNA clusters in Nipponbare endosperm

| Region                 | Length | endosperm_reads | endosperm_RPTM |
|------------------------|--------|-----------------|----------------|
| Chr1:3699712-3703446   | 3735   | 3088            | 2185.19        |
| Chr1:4260932-4268040   | 7109   | 12279           | 8689.1         |
| Chr1:4776252-4781931   | 5680   | 3092            | 2188.02        |
| Chr1:5577127-5590843   | 13717  | 38328           | 27122.4        |
| Chr1:5594143-5597892   | 3750   | 8181            | 5789.19        |
| Chr1:7151897-7157057   | 5161   | 3562            | 2520.61        |
| Chr1:7159014-7167085   | 8072   | 34987           | 24758.2        |
| Chr1:7170133-7174133   | 4001   | 4886            | 3457.52        |
| Chr1:7536240-7540264   | 4025   | 5069            | 3587.02        |
| Chr1:7541343-7547109   | 5767   | 9135            | 6464.28        |
| Chr1:8599429-8604337   | 4909   | 51444           | 36403.8        |
| Chr1:13950072-13957986 | 7915   | 30784           | 21784          |
| Chr1:14130361-14130667 | 307    | 4090            | 2894.24        |
| Chr1:18516522-18519391 | 2870   | 4642            | 3284.86        |
| Chr1:20862907-20865552 | 2646   | 3502            | 2478.15        |
| Chr1:22833158-22841076 | 7919   | 15182           | 10743.4        |
| Chr1:23310763-23312834 | 2072   | 4489            | 3176.59        |
| Chr1:23382930-23389754 | 6825   | 13634           | 9647.95        |
| Chr1:23395248-23400986 | 5739   | 20031           | 14174.7        |
| Chr1:26558643-26564521 | 5879   | 6055            | 4284.75        |
| Chr1:26924199-26932111 | 7913   | 47067           | 33306.4        |
| Chr1:32308796-32314030 | 5235   | 23594           | 16696          |
| Chr1:37168571-37173029 | 4459   | 11684           | 8268.05        |
| Chr1:38341385-38348660 | 7276   | 45696           | 32336.3        |
| Chr1:40437030-40441825 | 4796   | 5386            | 3811.34        |
| Chr1:40539621-40546418 | 6798   | 25431           | 17996          |
| Chr1:42568754-42574755 | 6002   | 8000            | 5661.11        |
| Chr2:6772541-6780956   | 8416   | 24542           | 17366.9        |
| Chr2:6781277-6783956   | 2680   | 3012            | 2131.41        |
| Chr2:7635652-7642634   | 6983   | 4968            | 3515.55        |
| Chr2:8587388-8593367   | 5980   | 5260            | 3722.18        |
| Chr2:9855067-9859230   | 4164   | 7819            | 5533.03        |
| Chr2:9860949-9863940   | 2992   | 8209            | 5809.01        |
| Chr2:11488559-11501617 | 13059  | 55429           | 39223.7        |
| Chr2:11897062-11902896 | 5835   | 3192            | 2258.78        |
| Chr2:14456000-14459752 | 3753   | 3566            | 2523.44        |
| Chr2:14923617-14926067 | 2451   | 5082            | 3596.22        |
| Chr2:17351656-17362573 | 10918  | 72826           | 51534.5        |
| Chr2:29053895-29058370 | 4476   | 8298            | 5871.99        |
| Chr2:30333408-30334387 | 980    | 3882            | 2747.05        |
| Chr2:33157188-33162071 | 4884   | 11246           | 7958.11        |
| Chr2:34010148-34015864 | 5717   | 3017            | 2134.95        |
| Chr3:6510677-6511004   | 328    | 24331           | 17217.6        |
| Chr3:9280806-9283054   | 2249   | 4789            | 3388.88        |
| Chr3:9283171-9285763   | 2593   | 4241            | 3001.1         |
| Chr3:12908213-12909522 | 1310   | 4852            | 3433.46        |
| Chr3:12909670-12911722 | 2053   | 5808            | 4109.97        |
| Chr3:12967070-12976657 | 9588   | 48620           | 34405.4        |
| Chr3:13250042-13256116 | 6075   | 9695            | 6860.56        |
| Chr3:16602800-16605557 | 2758   | 3620            | 2561.65        |
| Chr3:16864791-16871680 | 6890   | 4489            | 3176.59        |
| Chr3:17902445-17908218 | 5774   | 4337            | 3069.03        |
| Chr3:17908331-17911816 | 3486   | 4759            | 3367.65        |
| Chr3:25176521-25180837 | 4317   | 3688            | 2609.77        |
| Chr3:27070415-27073544 | 3130   | 6198            | 4385.95        |
| Chr3:32609748-32614193 | 4446   | 5019            | 3551.64        |
| Chr3:36125868-36131839 | 5972   | 8391            | 5937.8         |
| Chr4:1745684-1747360   | 1677   | 4161            | 2944.48        |
| Chr4:4588040-4593805   | 5766   | 49849           | 35275.1        |
| Chr4:4600073-4608106   | 8034   | 27628           | 19550.6        |
| Chr4:5474890-5477996   | 3107   | 4726            | 3344.3         |
| Chr4:5491394-5497324   | 5931   | 7169            | 5073.06        |
| Chr4:11672651-11677517 | 4867   | 11815           | 8360.75        |
| Chr4:12622611-12630837 | 8227   | 9950            | 7041.01        |
| Chr4:16872735-16879711 | 6977   | 3043            | 2153.34        |
| Chr4:16880431-16887050 | 6620   | 4942            | 3497.15        |
| Chr4:18421939-18426415 | 4477   | 11786           | 8340.23        |
| Chr4:18427336-18433949 | 6614   | 18601           | 13162.8        |
| Chr4:19448581-19453108 | 4528   | 9656            | 6832.96        |
| Chr4:19715121-19715243 | 123    | 2985            | 2112.3         |
| Chr4:19715477-19715584 | 108    | 16756           | 11857.2        |
| Chr4:21858330-21863964 | 5635   | 4352            | 3079.64        |
| Chr4:26769647-26774571 | 4925   | 38271           | 27082          |

|                        |       |        |         |
|------------------------|-------|--------|---------|
| Chr4:29781853-29785951 | 4099  | 5801   | 4105.01 |
| Chr4:31205978-31211720 | 5743  | 4538   | 3211.26 |
| Chr4:35113702-35118644 | 4943  | 19380  | 13714   |
| Chr5:543044-548100     | 5057  | 14696  | 10399.5 |
| Chr5:1510257-1513811   | 3555  | 6169   | 4365.42 |
| Chr5:5538679-5543298   | 4620  | 10831  | 7664.44 |
| Chr5:7102550-7109275   | 6726  | 6013   | 4255.03 |
| Chr5:7113669-7118855   | 5187  | 6215   | 4397.97 |
| Chr5:7190890-7197442   | 6553  | 8407   | 5949.12 |
| Chr5:10973694-10977337 | 3644  | 4188   | 2963.59 |
| Chr5:13579598-13584409 | 4812  | 6180   | 4373.21 |
| Chr5:13585373-13587312 | 1940  | 3393   | 2401.02 |
| Chr5:15192220-15196447 | 4228  | 7004   | 4956.3  |
| Chr5:18200643-18207204 | 6562  | 4536   | 3209.85 |
| Chr5:18226942-18233386 | 6445  | 40403  | 28590.7 |
| Chr5:18244531-18252770 | 8240  | 25278  | 17887.7 |
| Chr5:19267295-19273494 | 6200  | 9029   | 6389.27 |
| Chr5:19273621-19279216 | 5596  | 17550  | 12419.1 |
| Chr5:19704862-19710624 | 5763  | 6415   | 4539.5  |
| Chr5:20042720-20045331 | 2612  | 3267   | 2311.86 |
| Chr5:20466930-20470587 | 3658  | 4773   | 3377.56 |
| Chr5:22114552-22116524 | 1973  | 7032   | 4976.12 |
| Chr5:23709449-23716203 | 6755  | 10910  | 7720.34 |
| Chr5:24463339-24468826 | 5488  | 7231   | 5116.94 |
| Chr5:25076795-25080541 | 3747  | 2945   | 2084    |
| Chr5:26923669-26926976 | 3308  | 3013   | 2132.12 |
| Chr5:28641134-28646017 | 4884  | 8580   | 6071.54 |
| Chr6:518788-521036     | 2249  | 2895   | 2048.61 |
| Chr6:2598764-2603873   | 5110  | 7149   | 5058.91 |
| Chr6:2604838-2613043   | 8206  | 49217  | 34827.9 |
| Chr6:3724722-3731040   | 6319  | 6602   | 4671.83 |
| Chr6:3748674-3758502   | 9829  | 30767  | 21771.9 |
| Chr6:4974281-4975759   | 1479  | 3650   | 2582.88 |
| Chr6:6214351-6218208   | 3858  | 17152  | 12137.4 |
| Chr6:6420437-6435842   | 15406 | 68726  | 48633.2 |
| Chr6:12657135-12657443 | 309   | 3831   | 2710.96 |
| Chr6:12764609-12767052 | 2444  | 4785   | 3386.05 |
| Chr6:13329784-13329990 | 207   | 5731   | 4055.48 |
| Chr6:19501840-19512759 | 10920 | 13463  | 9526.94 |
| Chr6:19597247-19606841 | 9595  | 8372   | 5924.35 |
| Chr6:20991318-20996023 | 4706  | 12466  | 8821.42 |
| Chr6:21837740-21841292 | 3553  | 5536   | 3917.49 |
| Chr6:25785609-25794475 | 8867  | 50216  | 35534.8 |
| Chr6:30880570-30885135 | 4566  | 4171   | 2951.56 |
| Chr6:30926407-30932387 | 5981  | 19260  | 13629.1 |
| Chr6:30934501-30939773 | 5273  | 8385   | 5933.55 |
| Chr7:136275-139649     | 3375  | 4841   | 3425.68 |
| Chr7:1041444-1046253   | 4810  | 8510   | 6022.01 |
| Chr7:1299133-1302117   | 2985  | 10795  | 7638.96 |
| Chr7:4703562-4710912   | 7351  | 40300  | 28517.8 |
| Chr7:4988775-4999808   | 11034 | 79906  | 56544.6 |
| Chr7:6774867-6785518   | 10652 | 9439   | 6679.4  |
| Chr7:7211617-7219281   | 7665  | 34415  | 24353.4 |
| Chr7:8047974-8058021   | 10048 | 27939  | 19770.7 |
| Chr7:9122576-9122797   | 222   | 4339   | 3070.44 |
| Chr7:11005330-11016894 | 11565 | 40357  | 28558.2 |
| Chr7:18661509-18666987 | 5479  | 3239   | 2292.04 |
| Chr7:21685635-21694444 | 8810  | 47235  | 33425.3 |
| Chr7:21708832-21711565 | 2734  | 3080   | 2179.53 |
| Chr7:21714059-21720752 | 6694  | 79544  | 56288.4 |
| Chr7:21834761-21840963 | 6203  | 12766  | 9033.72 |
| Chr7:22527588-22531198 | 3611  | 6303   | 4460.25 |
| Chr7:28193106-28200419 | 7314  | 29072  | 20572.5 |
| Chr8:818500-822923     | 4424  | 4599   | 3254.43 |
| Chr8:1614778-1618869   | 4092  | 5696   | 4030.71 |
| Chr8:1627895-1633355   | 5461  | 22629  | 16013.2 |
| Chr8:4308030-4312675   | 4646  | 7468   | 5284.65 |
| Chr8:4366038-4369562   | 3525  | 2865   | 2027.39 |
| Chr8:4372421-4379910   | 7490  | 11311  | 8004.1  |
| Chr8:4380033-4383161   | 3129  | 4513   | 3193.57 |
| Chr8:5165968-5170308   | 4341  | 3965   | 2805.79 |
| Chr8:5172680-5177696   | 5017  | 8719   | 6169.9  |
| Chr8:7662701-7673315   | 10615 | 37907  | 26824.5 |
| Chr8:7694562-7701713   | 7152  | 6426   | 4547.29 |
| Chr8:8702584-8703105   | 522   | 100427 | 71066   |
| Chr8:9051839-9057509   | 5671  | 4262   | 3015.96 |
| Chr8:10866521-10873299 | 6779  | 34454  | 24381   |
| Chr8:10882220-10889865 | 7646  | 8612   | 6094.19 |
| Chr8:10890038-10894831 | 4794  | 22744  | 16094.5 |
| Chr8:14965911-14970477 | 4567  | 11771  | 8329.62 |
| Chr8:17184421-17189346 | 4926  | 8890   | 6290.91 |
| Chr8:17666819-17669871 | 3053  | 5229   | 3700.24 |
| Chr8:17701283-17712303 | 11021 | 14545  | 10292.6 |
| Chr8:17721765-17726019 | 4255  | 5375   | 3803.56 |
| Chr8:20987966-20993398 | 5433  | 9819   | 6948.31 |
| Chr8:21004031-21009540 | 5510  | 9286   | 6571.13 |
| Chr8:21423862-21432609 | 8748  | 22904  | 16207.8 |
| Chr8:22037072-22047584 | 10513 | 9289   | 6573.26 |

|                         |       |        |         |
|-------------------------|-------|--------|---------|
| Chr8:22080687-22089312  | 8626  | 26032  | 18421.3 |
| Chr8:22329945-22331794  | 1850  | 3672   | 2598.45 |
| Chr8:22467034-22473077  | 6044  | 41086  | 29074   |
| Chr8:22503701-22508998  | 5298  | 44804  | 31705   |
| Chr8:22821605-22829085  | 7481  | 4504   | 3187.2  |
| Chr9:1014-37759         | 36746 | 30953  | 21903.5 |
| Chr9:1070370-1078318    | 7949  | 6533   | 4623    |
| Chr9:1183588-1192199    | 8612  | 6448   | 4562.85 |
| Chr9:1195496-1201177    | 5682  | 15076  | 10668.4 |
| Chr9:1228561-1235121    | 6561  | 3871   | 2739.27 |
| Chr9:4617635-4619977    | 2343  | 2974   | 2104.52 |
| Chr9:5765708-5768851    | 3144  | 3211   | 2272.23 |
| Chr9:5769277-5780934    | 11658 | 37980  | 26876.1 |
| Chr9:6465808-6470439    | 4632  | 3454   | 2444.18 |
| Chr9:6544064-6554889    | 10826 | 32539  | 23025.9 |
| Chr9:8572142-8577814    | 5673  | 4159   | 2943.07 |
| Chr9:12921772-12925470  | 3699  | 2842   | 2011.11 |
| Chr9:14441072-14448242  | 7171  | 18801  | 13304.3 |
| Chr9:15991281-15995684  | 4404  | 11023  | 7800.3  |
| Chr9:16533117-16542149  | 9033  | 98950  | 70020.9 |
| Chr9:17592956-17603158  | 10203 | 36464  | 25803.3 |
| Chr9:18114403-18120398  | 5996  | 3440   | 2434.28 |
| Chr9:18963880-18967002  | 3123  | 5266   | 3726.43 |
| Chr9:19226656-19231907  | 5252  | 16684  | 11806.2 |
| Chr9:19305089-19309195  | 4107  | 3712   | 2626.76 |
| Chr9:19532886-19539445  | 6560  | 41387  | 29287   |
| Chr9:20616681-20622422  | 5742  | 24416  | 17277.7 |
| Chr9:21044077-21044386  | 310   | 8398   | 5942.75 |
| Chr9:21045164-21045661  | 498   | 3746   | 2650.81 |
| Chr9:21245909-21252086  | 6178  | 10266  | 7264.62 |
| Chr9:22069975-22075683  | 5709  | 4377   | 3097.33 |
| Chr10:2397960-2423525   | 25566 | 195271 | 138181  |
| Chr10:2727541-2733712   | 6172  | 33564  | 23751.2 |
| Chr10:2901761-2906633   | 4873  | 3509   | 2483.1  |
| Chr10:4833918-4834134   | 217   | 3160   | 2236.14 |
| Chr10:6928550-6928893   | 344   | 5466   | 3867.95 |
| Chr10:7297355-7304894   | 7540  | 14379  | 10175.1 |
| Chr10:12012669-12016454 | 3786  | 7303   | 5167.89 |
| Chr10:13749032-13758836 | 9805  | 24783  | 17537.4 |
| Chr11:2911079-2921919   | 10841 | 9322   | 6596.61 |
| Chr11:3993091-4002573   | 9483  | 129021 | 91300.3 |
| Chr11:4894957-4906014   | 11058 | 22607  | 15997.6 |
| Chr11:10854855-10859224 | 4370  | 4057   | 2870.89 |
| Chr11:11684803-11691018 | 6216  | 13485  | 9542.51 |
| Chr11:12180073-12187686 | 7614  | 3512   | 2485.23 |
| Chr11:12277522-12282433 | 4912  | 8660   | 6128.15 |
| Chr11:15737744-15740540 | 2797  | 5327   | 3769.59 |
| Chr11:16131029-16133470 | 2442  | 3294   | 2330.96 |
| Chr11:17860045-17865726 | 5682  | 8087   | 5722.67 |
| Chr11:18312134-18317187 | 5054  | 19221  | 13601.5 |
| Chr11:19099035-19109418 | 10384 | 4667   | 3302.55 |
| Chr11:21704245-21704368 | 124   | 5717   | 4045.57 |
| Chr11:25021244-25028096 | 6853  | 4112   | 2909.81 |
| Chr11:26689012-26694756 | 5745  | 2860   | 2023.85 |
| Chr11:28914356-28918364 | 4009  | 10390  | 7352.37 |
| Chr12:1813844-1817700   | 3857  | 4483   | 3172.34 |
| Chr12:2869401-2882809   | 13409 | 42183  | 29850.3 |
| Chr12:2893186-2897946   | 4761  | 3276   | 2318.22 |
| Chr12:3095465-3099872   | 4408  | 10013  | 7085.59 |
| Chr12:5575371-5579072   | 3702  | 2886   | 2042.25 |
| Chr12:6399784-6403003   | 3220  | 3920   | 2773.94 |
| Chr12:7743899-7747741   | 3843  | 2834   | 2005.45 |
| Chr12:8656069-8658444   | 2376  | 15668  | 11087.3 |
| Chr12:9355605-9356892   | 1288  | 4234   | 2996.14 |
| Chr12:10112258-10125312 | 13055 | 45254  | 32023.5 |
| Chr12:10176952-10184213 | 7262  | 27653  | 19568.3 |
| Chr12:10337265-10341384 | 4120  | 3520   | 2490.89 |
| Chr12:18660081-18660284 | 204   | 2867   | 2028.8  |
| Chr12:19319837-19325505 | 5669  | 12898  | 9127.12 |
| Chr12:19327241-19329934 | 2694  | 3564   | 2522.02 |
| Chr12:19362489-19362966 | 478   | 4788   | 3388.17 |
| Chr12:19373296-19377539 | 4244  | 28017  | 19825.9 |
| Chr12:19377644-19380316 | 2673  | 24063  | 17027.9 |
| Chr12:19389554-19392520 | 2967  | 4816   | 3407.99 |
| Chr12:19401064-19414731 | 13668 | 96285  | 68135   |
| Chr12:20876091-20884262 | 8172  | 9886   | 6995.72 |
| Chr12:24879829-24882413 | 2585  | 3836   | 2714.5  |

#### Bill-siRNA clusters in TP309 seedling

| Region                | Length | TP309 seedling-<br>R1_reads | TP309 seedling-<br>R2_reads | TP309 seedling-<br>R1_RPTM | TP309<br>seedling-<br>R2_RPTM |
|-----------------------|--------|-----------------------------|-----------------------------|----------------------------|-------------------------------|
| Chr10:4833387-4833506 | 120    | 6283                        | 5580                        | 4548.56                    | 4392.75                       |
| Chr12:9355709-9356884 | 1176   | 4105                        | 4191                        | 2971.8                     | 3299.29                       |
| Chr2:1553148-1553255  | 108    | 14825                       | 15457                       | 10732.5                    | 12168.2                       |

|                        |      |      |      |         |         |
|------------------------|------|------|------|---------|---------|
| Chr2:6001244-6001995   | 752  | 5985 | 24   | 4332.82 | 18.8935 |
| Chr2:8522078-8522111   | 34   | 6253 | 7836 | 4526.84 | 6168.74 |
| Chr3:30515079-30515181 | 103  | 2716 | 3188 | 1966.24 | 2509.69 |
| Chr4:19715121-19715307 | 187  | 4394 | 5097 | 3181.02 | 4012.52 |
| Chr4:19715477-19715702 | 226  | 4102 | 5200 | 2969.63 | 4093.6  |
| Chr6:13330447-13330641 | 195  | 2941 | 3135 | 2129.13 | 2467.97 |
| Chr6:21165722-21165845 | 124  | 6153 | 3246 | 4454.45 | 2555.35 |
| Chr7:136223-139657     | 3435 | 8894 | 9437 | 6438.79 | 7429.1  |
| Chr8:9193708-9194236   | 529  | 3503 | 3854 | 2535.99 | 3033.99 |

# Bill-siRNA clusters in TP309 inflorescence

| Region                  | Length | TP309<br>inflorescence-<br>R1_reads | TP309<br>inflorescence-<br>R2_reads | TP309<br>inflorescence-<br>R1_RPTM | TP309<br>inflorescence-<br>R2_RPTM |
|-------------------------|--------|-------------------------------------|-------------------------------------|------------------------------------|------------------------------------|
| Chr1:2521832-2525868    | 4037   | 4068                                | 4307                                | 4557.31                            | 4406.17                            |
| Chr1:2555533-2560396    | 4864   | 16889                               | 16059                               | 18920.4                            | 16428.8                            |
| Chr1:9039407-9044856    | 5450   | 12799                               | 8997                                | 14338.5                            | 9204.16                            |
| Chr1:9435855-9439656    | 3802   | 23905                               | 23598                               | 26780.3                            | 24141.4                            |
| Chr1:10921554-10924098  | 2545   | 6653                                | 6551                                | 7453.23                            | 6701.84                            |
| Chr1:10924269-10926494  | 2226   | 13817                               | 15319                               | 15478.9                            | 15671.7                            |
| Chr1:11189858-11191482  | 1625   | 4329                                | 3463                                | 4849.7                             | 3542.74                            |
| Chr1:11194285-11200503  | 6219   | 12863                               | 15561                               | 14410.2                            | 15919.3                            |
| Chr1:11360853-11365225  | 4373   | 22545                               | 24885                               | 25256.7                            | 25458                              |
| Chr1:11470340-11475439  | 5100   | 26501                               | 28745                               | 29688.6                            | 29406.9                            |
| Chr1:12139282-12145475  | 6194   | 5761                                | 5565                                | 6453.94                            | 5693.14                            |
| Chr1:14333189-14340569  | 7381   | 39838                               | 45119                               | 44629.8                            | 46157.9                            |
| Chr1:14959401-14964483  | 5083   | 5822                                | 6774                                | 6522.28                            | 6929.97                            |
| Chr1:20809576-20814772  | 5197   | 12859                               | 12792                               | 14405.7                            | 13086.5                            |
| Chr1:21008538-21015105  | 6568   | 4591                                | 4683                                | 5143.21                            | 4790.83                            |
| Chr1:25251600-25254709  | 3110   | 2623                                | 3009                                | 2938.5                             | 3078.28                            |
| Chr1:25311726-25313682  | 1957   | 4825                                | 5967                                | 5405.36                            | 6104.39                            |
| Chr1:26580342-26582385  | 2044   | 1971                                | 1763                                | 2208.07                            | 1803.59                            |
| Chr1:28199280-28206541  | 7262   | 40936                               | 38693                               | 45859.8                            | 39583.9                            |
| Chr1:28209600-28216678  | 7079   | 18496                               | 19053                               | 20720.7                            | 19491.7                            |
| Chr1:29052999-29057508  | 4510   | 6750                                | 8897                                | 7561.9                             | 9101.86                            |
| Chr1:30808064-30812188  | 4125   | 4696                                | 5441                                | 5260.84                            | 5566.28                            |
| Chr10:706462-709675     | 3214   | 6897                                | 6941                                | 7726.58                            | 7100.82                            |
| Chr10:3440843-3446855   | 6013   | 7091                                | 6580                                | 7943.92                            | 6731.51                            |
| Chr10:5924603-5934240   | 9638   | 34696                               | 34056                               | 38869.3                            | 34840.2                            |
| Chr10:15985585-15991286 | 5702   | 15528                               | 18748                               | 17395.7                            | 19179.7                            |
| Chr10:16003040-16005183 | 2144   | 3782                                | 6529                                | 4236.9                             | 6679.33                            |
| Chr10:16005550-16007065 | 1516   | 7279                                | 9390                                | 8154.53                            | 9606.21                            |
| Chr10:20776661-20779960 | 3300   | 7340                                | 9384                                | 8222.87                            | 9600.07                            |
| Chr11:2541020-2543933   | 2914   | 3082                                | 4910                                | 3452.71                            | 5023.05                            |
| Chr11:3230045-3233132   | 3088   | 13512                               | 14744                               | 15137.2                            | 15083.5                            |
| Chr11:7332520-7335712   | 3193   | 3052                                | 3039                                | 3419.1                             | 3108.97                            |
| Chr11:7731055-7741761   | 10707  | 61583                               | 65288                               | 68990.3                            | 66791.3                            |
| Chr11:8910215-8915580   | 5366   | 1960                                | 2352                                | 2195.75                            | 2406.16                            |
| Chr11:16329892-16336817 | 6926   | 44462                               | 50405                               | 49810                              | 51565.6                            |
| Chr11:17164428-17170275 | 5848   | 11077                               | 9748                                | 12409.4                            | 9972.45                            |
| Chr11:20706555-20709432 | 2878   | 9473                                | 11030                               | 10612.4                            | 11284                              |
| Chr11:22338292-22343006 | 4715   | 3721                                | 3101                                | 4168.57                            | 3172.4                             |
| Chr11:24387252-24394638 | 7387   | 26102                               | 31136                               | 29241.6                            | 31852.9                            |
| Chr11:27016567-27019285 | 2719   | 4296                                | 5513                                | 4812.73                            | 5639.94                            |
| Chr12:4726893-4738687   | 11795  | 53586                               | 56898                               | 60031.4                            | 58208.1                            |
| Chr12:4898719-4904134   | 5416   | 16599                               | 16300                               | 18595.6                            | 16675.3                            |
| Chr12:4911981-4917807   | 5827   | 17264                               | 16812                               | 19340.5                            | 17199.1                            |
| Chr12:5024937-5028201   | 3265   | 2398                                | 1787                                | 2686.44                            | 1828.15                            |
| Chr12:9061792-9066505   | 4714   | 3574                                | 3496                                | 4003.89                            | 3576.5                             |
| Chr12:17499964-17504299 | 4336   | 19005                               | 22375                               | 21290.9                            | 22890.2                            |
| Chr12:17984443-17989007 | 4565   | 11734                               | 14537                               | 13145.4                            | 14871.7                            |
| Chr12:18392996-18397217 | 4222   | 3548                                | 3820                                | 3974.76                            | 3907.96                            |
| Chr12:18860689-18866408 | 5720   | 16516                               | 17835                               | 18502.6                            | 18245.7                            |
| Chr12:24724489-24735566 | 11078  | 51876                               | 53574                               | 58115.7                            | 54807.6                            |
| Chr2:1553148-1553331    | 184    | 13059                               | 9198                                | 14629.8                            | 9409.79                            |
| Chr2:3700051-3702962    | 2912   | 1816                                | 1958                                | 2034.43                            | 2003.08                            |
| Chr2:5900026-5907024    | 6999   | 25295                               | 28839                               | 28337.5                            | 29503                              |
| Chr2:6759230-6764148    | 4919   | 11252                               | 13464                               | 12605.4                            | 13774                              |
| Chr2:6795066-6797015    | 1950   | 9726                                | 12171                               | 10895.9                            | 12451.2                            |
| Chr2:6797248-6798611    | 1364   | 4140                                | 5380                                | 4637.97                            | 5503.88                            |
| Chr2:7604967-7611993    | 7027   | 12270                               | 16746                               | 13745.9                            | 17131.6                            |
| Chr2:8343289-8346969    | 3681   | 13686                               | 13658                               | 15332.2                            | 13972.5                            |
| Chr2:8522078-8522114    | 37     | 3281                                | 4911                                | 3675.64                            | 5024.08                            |
| Chr2:8525127-8525258    | 132    | 1685                                | 2169                                | 1887.67                            | 2218.94                            |
| Chr2:13580496-13582726  | 2231   | 1895                                | 2670                                | 2122.93                            | 2731.48                            |
| Chr2:13582836-13584440  | 1605   | 9026                                | 8408                                | 10111.7                            | 8601.6                             |
| Chr2:13584554-13586358  | 1805   | 8089                                | 7306                                | 9061.96                            | 7474.22                            |
| Chr2:19469359-19471202  | 1844   | 18687                               | 15022                               | 20934.7                            | 15367.9                            |
| Chr2:29633230-29636007  | 2778   | 4345                                | 3970                                | 4867.62                            | 4061.41                            |
| Chr2:29777060-29783149  | 6090   | 5914                                | 8091                                | 6625.34                            | 8277.3                             |
| Chr2:33848550-33850734  | 2185   | 1638                                | 2343                                | 1835.02                            | 2396.95                            |
| Chr3:15609571-15614403  | 4833   | 2149                                | 3033                                | 2407.48                            | 3102.84                            |
| Chr3:16790294-16793977  | 3684   | 1793                                | 2251                                | 2008.66                            | 2302.83                            |
| Chr3:19352770-19356619  | 3850   | 1653                                | 2309                                | 1851.83                            | 2362.17                            |



|                        |       |       |       |         |         |
|------------------------|-------|-------|-------|---------|---------|
| Chr3:22402915-22411469 | 8555  | 29819 | 28889 | 33405.7 | 29554.2 |
| Chr3:24566448-24574132 | 7685  | 25154 | 30221 | 28179.6 | 30916.9 |
| Chr3:24600910-24606911 | 6002  | 10296 | 11782 | 11534.4 | 12053.3 |
| Chr3:26123026-26126247 | 3222  | 11966 | 12659 | 13405.3 | 12950.5 |
| Chr3:27616647-27619389 | 2743  | 1759  | 2337  | 1970.58 | 2390.81 |
| Chr3:27619512-27621777 | 2266  | 6852  | 8278  | 7676.17 | 8468.6  |
| Chr3:28510208-28511760 | 1553  | 1803  | 1974  | 2019.87 | 2019.45 |
| Chr3:29749941-29755991 | 6051  | 3523  | 2848  | 3946.75 | 2913.58 |
| Chr4:11651745-11657119 | 5375  | 3520  | 4442  | 3943.39 | 4544.28 |
| Chr4:19681434-19685210 | 3777  | 6360  | 8610  | 7124.99 | 8808.25 |
| Chr4:35049575-35053502 | 3928  | 20001 | 25287 | 22406.8 | 25869.2 |
| Chr5:661602-664198     | 2597  | 2424  | 2354  | 2715.56 | 2408.2  |
| Chr5:1132551-1140459   | 7909  | 13864 | 16924 | 15531.6 | 17313.7 |
| Chr5:1680404-1684309   | 3906  | 8537  | 10355 | 9563.84 | 10593.4 |
| Chr5:4825918-4831618   | 5701  | 9748  | 9163  | 10920.5 | 9373.98 |
| Chr5:10916929-10920211 | 3283  | 9925  | 10031 | 11118.8 | 10262   |
| Chr5:10920336-10923004 | 2669  | 2396  | 2768  | 2684.19 | 2831.73 |
| Chr5:11242416-11247138 | 4723  | 30244 | 33801 | 33881.8 | 34579.3 |
| Chr5:16055425-16058035 | 2611  | 6433  | 6468  | 7206.77 | 6616.93 |
| Chr5:25352167-25357744 | 5578  | 40804 | 41812 | 45712   | 42774.7 |
| Chr5:26871506-26874206 | 2701  | 7366  | 7569  | 8251.99 | 7743.28 |
| Chr6:6078050-6082881   | 4832  | 12068 | 12585 | 13519.6 | 12874.8 |
| Chr6:7535134-7539311   | 4178  | 18301 | 20073 | 20502.3 | 20535.2 |
| Chr6:11299542-11306993 | 7452  | 20105 | 22132 | 22523.3 | 22641.6 |
| Chr6:13424874-13438632 | 13759 | 57430 | 61030 | 64337.8 | 62435.2 |
| Chr6:17320172-17323420 | 3249  | 1919  | 2584  | 2149.82 | 2643.5  |
| Chr6:19709920-19712027 | 2108  | 3220  | 4041  | 3607.31 | 4134.05 |
| Chr6:21224117-21227496 | 3380  | 3291  | 4336  | 3686.85 | 4435.84 |
| Chr6:25366408-25367056 | 649   | 384   | 3936  | 430.188 | 4026.63 |
| Chr6:27798388-27809478 | 11091 | 28375 | 27040 | 31788   | 27662.6 |
| Chr6:28515631-28518627 | 2997  | 5120  | 5812  | 5735.84 | 5945.82 |
| Chr6:29376919-29380614 | 3696  | 29860 | 31602 | 33451.6 | 32329.6 |
| Chr7:996134-1001319    | 5186  | 3115  | 3802  | 3489.68 | 3889.54 |
| Chr7:4346893-4353143   | 6251  | 30246 | 34305 | 33884   | 35094.9 |
| Chr7:4372372-4376295   | 3924  | 22196 | 21356 | 24865.8 | 21847.7 |
| Chr7:8295232-8301023   | 5792  | 13472 | 13136 | 15092.4 | 13438.5 |
| Chr7:15712890-15717884 | 4995  | 6565  | 7538  | 7354.65 | 7711.57 |
| Chr7:15986459-15991194 | 4736  | 9959  | 12056 | 11156.9 | 12333.6 |
| Chr7:19999640-20006845 | 7206  | 7336  | 8111  | 8218.38 | 8297.76 |
| Chr7:23519976-23522197 | 2222  | 3520  | 8777  | 3943.39 | 8979.09 |
| Chr7:27168754-27170310 | 1557  | 1566  | 2486  | 1754.36 | 2543.24 |
| Chr8:5775694-5780872   | 5179  | 10368 | 11010 | 11615.1 | 11263.5 |
| Chr8:7667653-7671657   | 4005  | 4239  | 4141  | 4748.87 | 4236.35 |
| Chr8:7762820-7770869   | 8050  | 17656 | 19947 | 19779.7 | 20406.3 |
| Chr8:9442951-9449260   | 6310  | 8439  | 5604  | 9454.06 | 5733.03 |
| Chr8:10491753-10502270 | 10518 | 22145 | 27207 | 24808.6 | 27833.5 |
| Chr8:15452052-15462294 | 10243 | 67464 | 76165 | 75578.7 | 77918.7 |
| Chr8:16973609-16979484 | 5876  | 7310  | 9303  | 8189.26 | 9517.21 |
| Chr8:20978664-20986591 | 7928  | 12987 | 11991 | 14549.1 | 12267.1 |
| Chr8:21691353-21695461 | 4109  | 9967  | 10080 | 11165.8 | 10312.1 |
| Chr8:27145002-27147836 | 2835  | 5669  | 6646  | 6350.88 | 6799.03 |
| Chr9:1292223-1297850   | 5628  | 6319  | 6102  | 7079.06 | 6242.5  |
| Chr9:3227798-3229695   | 1898  | 1943  | 2916  | 2176.71 | 2983.14 |
| Chr9:3229897-3231862   | 1966  | 2222  | 3441  | 2489.27 | 3520.23 |
| Chr9:9556895-9558464   | 1570  | 2689  | 2822  | 3012.44 | 2886.98 |
| Chr9:12420620-12427040 | 6421  | 3341  | 6587  | 3742.86 | 6738.67 |
| Chr9:12621912-12623506 | 1595  | 2234  | 2984  | 2502.71 | 3052.71 |
| Chr9:15228009-15232300 | 4292  | 3975  | 4498  | 4453.12 | 4601.57 |
| Chr9:16723081-16727621 | 4541  | 27519 | 32411 | 30829   | 33157.3 |

# Bill-siRNA clusters in TP309 endosperm

| Region                 | Length | TP309           | TP309          |
|------------------------|--------|-----------------|----------------|
|                        |        | endosperm_reads | endosperm_RPTM |
| Chr1:2555817-2559537   | 3721   | 1866            | 2360.25        |
| Chr1:3699714-3703754   | 4041   | 2659            | 3363.29        |
| Chr1:4261876-4267470   | 5595   | 5786            | 7318.53        |
| Chr1:5577343-5580874   | 3532   | 6283            | 7947.17        |
| Chr1:5581730-5589870   | 8141   | 18767           | 23737.8        |
| Chr1:7152190-7157133   | 4944   | 3849            | 4868.48        |
| Chr1:7158856-7166897   | 8042   | 23247           | 29404.4        |
| Chr1:7170230-7174138   | 3909   | 3698            | 4677.49        |
| Chr1:7537357-7540212   | 2856   | 3591            | 4542.14        |
| Chr1:7541440-7547107   | 5668   | 7642            | 9666.13        |
| Chr1:8599564-8604129   | 4566   | 30365           | 38407.7        |
| Chr1:9436219-9439656   | 3438   | 2067            | 2614.48        |
| Chr1:10924271-10926494 | 2224   | 1600            | 2023.79        |
| Chr1:11360931-11363743 | 2813   | 1954            | 2471.55        |
| Chr1:11470747-11475396 | 4650   | 2807            | 3550.49        |
| Chr1:13956842-13958367 | 1526   | 2168            | 2742.24        |
| Chr1:14333331-14335954 | 2624   | 1621            | 2050.35        |
| Chr1:18516962-18519248 | 2287   | 4813            | 6087.81        |
| Chr1:22834155-22840290 | 6136   | 12641           | 15989.2        |
| Chr1:23310769-23311842 | 1074   | 3412            | 4315.73        |
| Chr1:23383832-23389553 | 5722   | 8838            | 11178.9        |

|                        |       |       |         |
|------------------------|-------|-------|---------|
| Chr1:23395273-23399801 | 4529  | 13254 | 16764.6 |
| Chr1:23399986-23400995 | 1010  | 1916  | 2423.49 |
| Chr1:23401097-23403318 | 2222  | 1929  | 2439.93 |
| Chr1:26924287-26931228 | 6942  | 28697 | 36297.9 |
| Chr1:28200251-28206538 | 6288  | 4000  | 5059.48 |
| Chr1:28209635-28215248 | 5614  | 2069  | 2617.01 |
| Chr1:32309674-32313890 | 4217  | 16108 | 20374.5 |
| Chr1:38341440-38345532 | 4093  | 26278 | 33238.2 |
| Chr1:40436957-40441074 | 4118  | 4051  | 5123.98 |
| Chr1:40539348-40547010 | 7663  | 22214 | 28097.8 |
| Chr1:42569168-42574745 | 5578  | 7798  | 9863.45 |
| Chr2:1553148-1553230   | 83    | 1679  | 2123.72 |
| Chr2:5901667-5906692   | 5026  | 2648  | 3349.37 |
| Chr2:6772790-6780961   | 8172  | 20509 | 25941.2 |
| Chr2:6781336-6783447   | 2112  | 2169  | 2743.5  |
| Chr2:8587463-8593392   | 5930  | 3229  | 4084.26 |
| Chr2:9855347-9859240   | 3894  | 6607  | 8356.99 |
| Chr2:9860994-9864595   | 3602  | 4521  | 5718.47 |
| Chr2:11488553-11490907 | 2355  | 6692  | 8464.5  |
| Chr2:11491077-11494505 | 3429  | 7017  | 8875.59 |
| Chr2:11494675-11501541 | 6867  | 8793  | 11122   |
| Chr2:12214657-12217238 | 2582  | 1674  | 2117.39 |
| Chr2:12222936-12226254 | 3319  | 3941  | 4984.85 |
| Chr2:14455844-14459675 | 3832  | 2343  | 2963.59 |
| Chr2:14924396-14926082 | 1687  | 2772  | 3506.22 |
| Chr2:17351657-17362932 | 11276 | 53272 | 67382.1 |
| Chr2:27250593-27255473 | 4881  | 2094  | 2648.64 |
| Chr2:29055270-29056420 | 1151  | 2434  | 3078.69 |
| Chr2:33157187-33161980 | 4794  | 8263  | 10451.6 |
| Chr3:4508546-4513609   | 5064  | 2919  | 3692.15 |
| Chr3:9280904-9283063   | 2160  | 2872  | 3632.7  |
| Chr3:9283221-9285209   | 1989  | 1992  | 2519.62 |
| Chr3:12910246-12911368 | 1123  | 2366  | 2992.68 |
| Chr3:12967060-12976252 | 9193  | 36817 | 46568.7 |
| Chr3:13250645-13256185 | 5541  | 8621  | 10904.4 |
| Chr3:16865584-16870045 | 4462  | 5656  | 7154.1  |
| Chr3:17536623-17539556 | 2934  | 3131  | 3960.3  |
| Chr3:17905920-17908217 | 2298  | 2129  | 2692.91 |
| Chr3:20976158-20978551 | 2394  | 2613  | 3305.1  |
| Chr3:22406105-22410755 | 4651  | 2713  | 3431.59 |
| Chr3:24569576-24573183 | 3608  | 2173  | 2748.56 |
| Chr3:25178120-25180813 | 2694  | 2408  | 3045.8  |
| Chr3:27070389-27071836 | 1448  | 2387  | 3019.24 |
| Chr3:32610068-32614223 | 4156  | 3462  | 4378.98 |
| Chr3:36126102-36131813 | 5712  | 7215  | 9126.03 |
| Chr4:1745938-1747341   | 1404  | 2484  | 3141.93 |
| Chr4:4588052-4594154   | 6103  | 37539 | 47481.9 |
| Chr4:4600166-4607239   | 7074  | 18691 | 23641.7 |
| Chr4:5474860-5477069   | 2210  | 1828  | 2312.18 |
| Chr4:5491378-5496958   | 5581  | 5730  | 7247.7  |
| Chr4:11672863-11674397 | 1535  | 4650  | 5881.64 |
| Chr4:12622421-12627621 | 5201  | 7132  | 9021.05 |
| Chr4:12628376-12630742 | 2367  | 5484  | 6936.54 |
| Chr4:18422338-18426438 | 4101  | 9240  | 11687.4 |
| Chr4:18427813-18433505 | 5693  | 17505 | 22141.5 |
| Chr4:19448557-19452694 | 4138  | 7317  | 9255.05 |
| Chr4:19715123-19715247 | 125   | 3173  | 4013.43 |
| Chr4:19715478-19715592 | 115   | 3899  | 4931.72 |
| Chr4:26769648-26774368 | 4721  | 32777 | 41458.6 |
| Chr4:29781896-29785364 | 3469  | 6346  | 8026.86 |
| Chr4:35050583-35053416 | 2834  | 2186  | 2765    |
| Chr4:35113552-35118575 | 5024  | 14294 | 18080   |
| Chr5:542947-547817     | 4871  | 11331 | 14332.2 |
| Chr5:1510260-1513820   | 3561  | 4814  | 6089.08 |
| Chr5:5540375-5543272   | 2898  | 6471  | 8184.97 |
| Chr5:7102993-7105878   | 2886  | 3903  | 4936.78 |
| Chr5:7111061-7114368   | 3308  | 2685  | 3396.17 |
| Chr5:7114691-7118407   | 3717  | 3102  | 3923.62 |
| Chr5:7191775-7197339   | 5565  | 3378  | 4272.73 |
| Chr5:10975028-10977237 | 2210  | 3354  | 4242.37 |
| Chr5:11242426-11246723 | 4298  | 3034  | 3837.61 |
| Chr5:11485814-11487867 | 2054  | 1618  | 2046.56 |
| Chr5:13579674-13583497 | 3824  | 4210  | 5325.1  |
| Chr5:13585420-13587791 | 2372  | 3005  | 3800.93 |
| Chr5:13705694-13708544 | 2851  | 2270  | 2871.25 |
| Chr5:15193335-15196279 | 2945  | 4417  | 5586.93 |
| Chr5:18201880-18205972 | 4093  | 2271  | 2872.52 |
| Chr5:18227558-18229750 | 2193  | 8105  | 10251.8 |
| Chr5:18229870-18231749 | 1880  | 9325  | 11794.9 |
| Chr5:18231870-18233377 | 1508  | 3285  | 4155.09 |
| Chr5:18244456-18252742 | 8287  | 25767 | 32591.9 |
| Chr5:19267669-19272364 | 4696  | 6124  | 7746.06 |
| Chr5:19273592-19280592 | 7001  | 14815 | 18739   |
| Chr5:19706371-19710576 | 4206  | 3562  | 4505.46 |
| Chr5:20468280-20470120 | 1841  | 2251  | 2847.22 |
| Chr5:22115721-22116500 | 780   | 3430  | 4338.5  |
| Chr5:23709442-23714420 | 4979  | 7268  | 9193.07 |
| Chr5:24463732-24468729 | 4998  | 4414  | 5583.13 |

|                        |       |       |         |
|------------------------|-------|-------|---------|
| Chr5:25352224-25357093 | 4870  | 4118  | 5208.73 |
| Chr5:26871607-26874206 | 2600  | 1777  | 2247.67 |
| Chr5:28636425-28640359 | 3935  | 2137  | 2703.03 |
| Chr5:28641249-28645794 | 4546  | 6325  | 8000.3  |
| Chr6:518901-520279     | 1379  | 2689  | 3401.23 |
| Chr6:2599635-2602223   | 2589  | 5853  | 7403.28 |
| Chr6:2605685-2613039   | 7355  | 46291 | 58552.1 |
| Chr6:3724856-3731384   | 6529  | 2581  | 3264.63 |
| Chr6:3749428-3756160   | 6733  | 16190 | 20478.2 |
| Chr6:4972341-4975523   | 3183  | 2623  | 3317.75 |
| Chr6:6214384-6218259   | 3876  | 10848 | 13721.3 |
| Chr6:6420346-6424513   | 4168  | 27213 | 34420.9 |
| Chr6:6424616-6435985   | 11370 | 27408 | 34667.5 |
| Chr6:7535537-7538954   | 3418  | 2156  | 2727.06 |
| Chr6:11301676-11304945 | 3270  | 1986  | 2512.03 |
| Chr6:12764862-12767057 | 2196  | 4404  | 5570.48 |
| Chr6:13330467-13330603 | 137   | 3099  | 3919.83 |
| Chr6:13427980-13432318 | 4339  | 4528  | 5727.33 |
| Chr6:19501897-19503998 | 2102  | 2681  | 3391.11 |
| Chr6:19504583-19512740 | 8158  | 7337  | 9280.34 |
| Chr6:19597247-19601144 | 3898  | 3225  | 4079.2  |
| Chr6:19601278-19608176 | 6899  | 3958  | 5006.35 |
| Chr6:20991321-20996172 | 4852  | 12810 | 16203   |
| Chr6:21165719-21165845 | 127   | 1877  | 2374.16 |
| Chr6:21423301-21426899 | 3599  | 1859  | 2351.39 |
| Chr6:21837795-21841265 | 3471  | 3240  | 4098.18 |
| Chr6:25786231-25794475 | 8245  | 31730 | 40134.3 |
| Chr6:27799534-27809084 | 9551  | 2813  | 3558.08 |
| Chr6:29376922-29380068 | 3147  | 2704  | 3420.21 |
| Chr6:30926664-30929077 | 2414  | 5413  | 6846.74 |
| Chr6:30934342-30939003 | 4662  | 7370  | 9322.08 |
| Chr7:1043841-1045960   | 2120  | 5362  | 6782.23 |
| Chr7:1299213-1300476   | 1264  | 2048  | 2590.45 |
| Chr7:1300579-1302134   | 1556  | 3749  | 4741.99 |
| Chr7:4348719-4353078   | 4360  | 3194  | 4039.99 |
| Chr7:4373503-4376249   | 2747  | 1909  | 2414.63 |
| Chr7:4702318-4703457   | 1140  | 2146  | 2714.41 |
| Chr7:4703562-4711302   | 7741  | 40806 | 51614.2 |
| Chr7:4988786-4999548   | 10763 | 69592 | 88024.8 |
| Chr7:6774396-6785581   | 11186 | 12889 | 16302.9 |
| Chr7:7212409-7219225   | 6817  | 27747 | 35096.3 |
| Chr7:8048308-8058185   | 9878  | 25415 | 32146.6 |
| Chr7:10096589-10098596 | 2008  | 1779  | 2250.2  |
| Chr7:11006183-11014929 | 8747  | 18885 | 23887.1 |
| Chr7:18661540-18667035 | 5496  | 2571  | 3251.98 |
| Chr7:21685950-21694147 | 8198  | 35584 | 45009.1 |
| Chr7:21709023-21711343 | 2321  | 2003  | 2533.53 |
| Chr7:21714111-21720595 | 6485  | 64007 | 80960.5 |
| Chr7:21834781-21840621 | 5841  | 9459  | 11964.4 |
| Chr7:22527006-22529808 | 2803  | 3831  | 4845.71 |
| Chr7:28193302-28200487 | 7186  | 22522 | 28487.4 |
| Chr8:818532-823346     | 4815  | 5344  | 6759.46 |
| Chr8:1614766-1618337   | 3572  | 4663  | 5898.08 |
| Chr8:1627995-1632953   | 4959  | 13422 | 16977.1 |
| Chr8:4307989-4312922   | 4934  | 8212  | 10387.1 |
| Chr8:4365993-4370070   | 4078  | 3332  | 4214.54 |
| Chr8:4372430-4379913   | 7484  | 13898 | 17579.1 |
| Chr8:4380025-4383115   | 3091  | 5332  | 6744.28 |
| Chr8:5165785-5170277   | 4493  | 3256  | 4118.41 |
| Chr8:5173938-5177687   | 3750  | 6145  | 7772.62 |
| Chr8:7662655-7666363   | 3709  | 7721  | 9766.05 |
| Chr8:7667556-7673470   | 5915  | 27582 | 34887.6 |
| Chr8:7695227-7698695   | 3469  | 1979  | 2503.18 |
| Chr8:7698802-7701224   | 2423  | 4334  | 5481.94 |
| Chr8:7764346-7769796   | 5451  | 1909  | 2414.63 |
| Chr8:8702817-8702918   | 102   | 15459 | 19553.6 |
| Chr8:9145444-9150968   | 5525  | 5546  | 7014.96 |
| Chr8:9193386-9194236   | 851   | 1732  | 2190.75 |
| Chr8:10492153-10499819 | 7667  | 2312  | 2924.38 |
| Chr8:10867556-10873271 | 5716  | 24643 | 31170.2 |
| Chr8:10883033-10889820 | 6788  | 6266  | 7925.67 |
| Chr8:10890038-10895268 | 5231  | 18086 | 22876.4 |
| Chr8:14966160-14970456 | 4297  | 4242  | 5365.57 |
| Chr8:15452407-15462092 | 9686  | 6503  | 8225.44 |
| Chr8:17184322-17189325 | 5004  | 7222  | 9134.88 |
| Chr8:17666814-17670168 | 3355  | 3993  | 5050.62 |
| Chr8:17700636-17711324 | 10689 | 23988 | 30341.7 |
| Chr8:17721388-17725886 | 4499  | 5666  | 7166.75 |
| Chr8:20989285-20992609 | 3325  | 6568  | 8307.66 |
| Chr8:21004088-21007118 | 3031  | 2732  | 3455.62 |
| Chr8:21007238-21008907 | 1670  | 4374  | 5532.54 |
| Chr8:21424114-21432407 | 8294  | 23747 | 30036.8 |
| Chr8:21718482-21722308 | 3827  | 2504  | 3167.23 |
| Chr8:22036937-22047604 | 10668 | 10979 | 13887   |
| Chr8:22081006-22088810 | 7805  | 24586 | 31098.1 |
| Chr8:22467052-22472178 | 5127  | 26020 | 32911.9 |
| Chr8:22503692-22508451 | 4760  | 27280 | 34505.6 |
| Chr9:1074972-1077703   | 2732  | 2551  | 3226.68 |

|                         |       |        |         |
|-------------------------|-------|--------|---------|
| Chr9:1183551-1187227    | 3677  | 1834   | 2319.77 |
| Chr9:1187645-1193903    | 6259  | 2976   | 3764.25 |
| Chr9:1196074-1200878    | 4805  | 16261  | 20568   |
| Chr9:5765838-5768762    | 2925  | 3134   | 3964.1  |
| Chr9:5769297-5781150    | 11854 | 39503  | 49966.1 |
| Chr9:6544463-6554851    | 10389 | 21176  | 26784.9 |
| Chr9:14440984-14446995  | 6012  | 8904   | 11262.4 |
| Chr9:15991312-15994476  | 3165  | 7222   | 9134.88 |
| Chr9:16533266-16542020  | 8755  | 58894  | 74493.2 |
| Chr9:16723088-16726859  | 3772  | 2644   | 3344.31 |
| Chr9:17595818-17598076  | 2259  | 12418  | 15707.1 |
| Chr9:17598267-17600109  | 1843  | 7323   | 9262.64 |
| Chr9:17600222-17603773  | 3552  | 7671   | 9702.81 |
| Chr9:18963885-18967011  | 3127  | 4445   | 5622.34 |
| Chr9:19227589-19232609  | 5021  | 9684   | 12249   |
| Chr9:19305108-19309221  | 4114  | 3456   | 4371.39 |
| Chr9:19533321-19539840  | 6520  | 25659  | 32455.3 |
| Chr9:20615578-20619926  | 4349  | 14136  | 17880.2 |
| Chr9:20620444-20622430  | 1987  | 3708   | 4690.13 |
| Chr9:21044080-21044115  | 36    | 2052   | 2595.51 |
| Chr9:21045372-21045594  | 223   | 2078   | 2628.4  |
| Chr9:21246679-21252218  | 5540  | 10241  | 12953.5 |
| Chr9:21325122-21328310  | 3189  | 1962   | 2481.67 |
| Chr9:22069981-22075731  | 5751  | 4234   | 5355.46 |
| Chr10:2401007-2401784   | 778   | 1812   | 2291.94 |
| Chr10:2404814-2405822   | 1009  | 1823   | 2305.86 |
| Chr10:2406276-2413314   | 7039  | 36033  | 45577   |
| Chr10:2414426-2414672   | 247   | 2349   | 2971.18 |
| Chr10:2414861-2416625   | 1765  | 3616   | 4573.77 |
| Chr10:2417173-2418145   | 973   | 2900   | 3668.12 |
| Chr10:2727526-2733192   | 5667  | 15429  | 19515.7 |
| Chr10:2901998-2905947   | 3950  | 2514   | 3179.88 |
| Chr10:5925634-5933475   | 7842  | 3649   | 4615.51 |
| Chr10:7297363-7304913   | 7551  | 11898  | 15049.4 |
| Chr10:12013970-12014975 | 1006  | 1830   | 2314.71 |
| Chr10:12015089-12016218 | 1130  | 1683   | 2128.77 |
| Chr10:13749172-13754341 | 5170  | 12363  | 15637.6 |
| Chr10:13754623-13756981 | 2359  | 1697   | 2146.48 |
| Chr10:15987275-15991248 | 3974  | 1865   | 2358.98 |
| Chr11:2911331-2921755   | 10425 | 13381  | 16925.2 |
| Chr11:2923313-2924804   | 1492  | 1649   | 2085.77 |
| Chr11:3993089-4002847   | 9759  | 104083 | 131651  |
| Chr11:4894960-4906153   | 11194 | 10763  | 13613.8 |
| Chr11:7731165-7734531   | 3367  | 2720   | 3440.44 |
| Chr11:7738737-7741790   | 3054  | 1834   | 2319.77 |
| Chr11:9449531-9451996   | 2466  | 2484   | 3141.93 |
| Chr11:11687676-11688950 | 1275  | 5122   | 6478.66 |
| Chr11:11689057-11689811 | 755   | 2156   | 2727.06 |
| Chr11:15737757-15739855 | 2099  | 2607   | 3297.51 |
| Chr11:16130605-16133551 | 2947  | 1664   | 2104.74 |
| Chr11:16330799-16336649 | 5851  | 4332   | 5479.41 |
| Chr11:17860076-17865726 | 5651  | 7842   | 9919.1  |
| Chr11:18312138-18317185 | 5048  | 8200   | 10371.9 |
| Chr11:19102806-19106758 | 3953  | 4257   | 5384.55 |
| Chr11:24387678-24394624 | 6947  | 3471   | 4390.36 |
| Chr11:25023874-25025610 | 1737  | 1826   | 2309.65 |
| Chr11:28915041-28917571 | 2531  | 6399   | 8093.9  |
| Chr12:2869634-2882792   | 13159 | 36676  | 46390.3 |
| Chr12:2893885-2897910   | 4026  | 3040   | 3845.2  |
| Chr12:3094190-3099633   | 5444  | 6601   | 8349.4  |
| Chr12:4728657-4736294   | 7638  | 4821   | 6097.93 |
| Chr12:4912415-4916843   | 4429  | 2027   | 2563.89 |
| Chr12:5575307-5579337   | 4031  | 3225   | 4079.2  |
| Chr12:6399805-6403120   | 3316  | 1998   | 2527.21 |
| Chr12:7180675-7184679   | 4005  | 2358   | 2982.56 |
| Chr12:8656081-8658356   | 2276  | 12995  | 16437   |
| Chr12:10112359-10115339 | 2981  | 4401   | 5566.69 |
| Chr12:10115608-10124195 | 8588  | 30653  | 38772   |
| Chr12:10177918-10185087 | 7170  | 22550  | 28522.8 |
| Chr12:10337333-10340366 | 3034  | 2672   | 3379.73 |
| Chr12:13480000-13482762 | 2763  | 3487   | 4410.6  |
| Chr12:17500497-17503825 | 3329  | 2042   | 2582.86 |
| Chr12:19319050-19323890 | 4841  | 7768   | 9825.5  |
| Chr12:19327437-19329763 | 2327  | 3450   | 4363.8  |
| Chr12:19374466-19377539 | 3074  | 24336  | 30781.9 |
| Chr12:19377669-19380258 | 2590  | 22818  | 28861.8 |
| Chr12:19389016-19392455 | 3440  | 6647   | 8407.58 |
| Chr12:19401051-19414790 | 13740 | 81001  | 102456  |
| Chr12:20875170-20883468 | 8299  | 5771   | 7299.56 |
| Chr12:22699696-22701320 | 1625  | 1764   | 2231.23 |
| Chr12:24728433-24734446 | 6014  | 4977   | 6295.25 |
| Chr12:24879830-24881083 | 1254  | 3226   | 4080.47 |

| Region                 | Length | TP309 seed<br>coat_reads | TP309 seed<br>coat_RPTM |
|------------------------|--------|--------------------------|-------------------------|
| Chr1:2521761-2525534   | 3774   | 10397                    | 6751.76                 |
| Chr1:2555533-2560009   | 4477   | 41450                    | 26917.4                 |
| Chr1:9039052-9045759   | 6708   | 41082                    | 26678.4                 |
| Chr1:9435827-9439656   | 3830   | 56822                    | 36899.9                 |
| Chr1:10921606-10924098 | 2493   | 12447                    | 8083.02                 |
| Chr1:10924269-10926494 | 2226   | 38231                    | 24827                   |
| Chr1:11187808-11189665 | 1858   | 5438                     | 3531.41                 |
| Chr1:11189850-11192208 | 2359   | 11773                    | 7645.33                 |
| Chr1:11194285-11201191 | 6907   | 34123                    | 22159.3                 |
| Chr1:11360799-11365089 | 4291   | 73647                    | 47826                   |
| Chr1:11470333-11475439 | 5107   | 90314                    | 58649.5                 |
| Chr1:12139277-12145610 | 6334   | 22602                    | 14677.6                 |
| Chr1:14333171-14340725 | 7555   | 106793                   | 69350.8                 |
| Chr1:14959356-14964153 | 4798   | 24458                    | 15882.9                 |
| Chr1:19259410-19274571 | 15162  | 12069                    | 7837.55                 |
| Chr1:20809709-20814697 | 4989   | 33411                    | 21696.9                 |
| Chr1:21008538-21023337 | 14800  | 18602                    | 12080                   |
| Chr1:25251585-25254751 | 3167   | 6110                     | 3967.8                  |
| Chr1:25311726-25313915 | 2190   | 16027                    | 10407.9                 |
| Chr1:26580525-26582395 | 1871   | 4553                     | 2956.7                  |
| Chr1:28199276-28206541 | 7266   | 123176                   | 79989.9                 |
| Chr1:28209600-28216678 | 7079   | 66571                    | 43230.9                 |
| Chr1:29052691-29057130 | 4440   | 29406                    | 19096.1                 |
| Chr1:30807458-30812193 | 4736   | 12190                    | 7916.12                 |
| Chr1:39322719-39324563 | 1845   | 4400                     | 2857.34                 |
| Chr2:1292602-1294479   | 1878   | 3502                     | 2274.18                 |
| Chr2:3700082-3702958   | 2877   | 4951                     | 3215.15                 |
| Chr2:5899763-5907331   | 7569   | 86576                    | 56222                   |
| Chr2:6758826-6764429   | 5604   | 35993                    | 23373.7                 |
| Chr2:6795025-6797018   | 1994   | 25003                    | 16236.8                 |
| Chr2:6797255-6798739   | 1485   | 14221                    | 9235.05                 |
| Chr2:7603850-7612031   | 8182   | 49094                    | 31881.4                 |
| Chr2:8343262-8350085   | 6824   | 53082                    | 34471.2                 |
| Chr2:13580497-13582726 | 2230   | 8042                     | 5222.43                 |
| Chr2:13582835-13584440 | 1606   | 21480                    | 13949                   |
| Chr2:13584553-13586359 | 1807   | 18980                    | 12325.5                 |
| Chr2:16555790-16558432 | 2643   | 3286                     | 2133.91                 |
| Chr2:17352184-17362368 | 10185  | 3660                     | 2376.79                 |
| Chr2:19469135-19471202 | 2068   | 33551                    | 21787.9                 |
| Chr2:29633229-29636004 | 2776   | 7944                     | 5158.79                 |
| Chr2:29777047-29782815 | 5769   | 19128                    | 12421.6                 |
| Chr2:33666331-33670765 | 4435   | 4813                     | 3125.54                 |
| Chr2:33847610-33850584 | 2975   | 6909                     | 4486.67                 |
| Chr3:10131213-10135276 | 4064   | 4891                     | 3176.19                 |
| Chr3:12709269-12710829 | 1561   | 5367                     | 3485.3                  |
| Chr3:12711053-12713326 | 2274   | 5180                     | 3363.87                 |
| Chr3:12967457-12976059 | 8603   | 11405                    | 7406.35                 |
| Chr3:15609566-15614287 | 4722   | 7576                     | 4919.82                 |
| Chr3:16165151-16169246 | 4096   | 4726                     | 3069.04                 |
| Chr3:16790322-16793969 | 3648   | 6329                     | 4110.02                 |
| Chr3:17534150-17543648 | 9499   | 20408                    | 13252.9                 |
| Chr3:19353251-19356624 | 3374   | 3226                     | 2094.95                 |
| Chr3:22402320-22411470 | 9151   | 84547                    | 54904.4                 |
| Chr3:24408927-24413594 | 4668   | 3377                     | 2193.01                 |
| Chr3:24566342-24574131 | 7790   | 87274                    | 56675.3                 |
| Chr3:24600899-24607135 | 6237   | 29303                    | 19029.2                 |
| Chr3:26123027-26126245 | 3219   | 28354                    | 18412.9                 |
| Chr3:26143503-26145459 | 1957   | 3956                     | 2569.01                 |
| Chr3:27617305-27621763 | 4459   | 33321                    | 21638.5                 |
| Chr3:29748690-29757209 | 8520   | 17679                    | 11480.7                 |
| Chr4:11651699-11659200 | 7502   | 10093                    | 6554.34                 |
| Chr4:19681040-19685207 | 4168   | 25269                    | 16409.6                 |
| Chr4:23337249-23341399 | 4151   | 4253                     | 2761.88                 |
| Chr4:35049574-35053501 | 3928   | 77874                    | 50571                   |
| Chr5:661501-664202     | 2702   | 4316                     | 2802.79                 |
| Chr5:1132446-1140507   | 8062   | 57162                    | 37120.7                 |
| Chr5:1679719-1685842   | 6124   | 24000                    | 15585.5                 |
| Chr5:4824691-4831616   | 6926   | 39053                    | 25360.8                 |
| Chr5:10916681-10920212 | 3532   | 36938                    | 23987.4                 |
| Chr5:10920336-10923044 | 2709   | 15297                    | 9933.79                 |
| Chr5:11242416-11246815 | 4400   | 96684                    | 62786.1                 |
| Chr5:16055424-16058037 | 2614   | 21599                    | 14026.3                 |
| Chr5:19884414-19887244 | 2831   | 5951                     | 3864.55                 |
| Chr5:25347432-25352003 | 4572   | 9833                     | 6385.5                  |
| Chr5:25352165-25357702 | 5538   | 137780                   | 89473.6                 |
| Chr5:26871666-26874206 | 2541   | 26494                    | 17205.1                 |
| Chr6:6074353-6077281   | 2929   | 3969                     | 2577.45                 |
| Chr6:6078050-6083497   | 5448   | 44557                    | 28935.1                 |
| Chr6:7380634-7384393   | 3760   | 5793                     | 3761.95                 |
| Chr6:7534413-7539307   | 4895   | 59362                    | 38549.4                 |
| Chr6:11299537-11305651 | 6115   | 60176                    | 39078                   |
| Chr6:12034039-12041755 | 7717   | 6408                     | 4161.32                 |
| Chr6:13424894-13438639 | 13746  | 171928                   | 111649                  |
| Chr6:17320069-17323450 | 3382   | 10015                    | 6503.69                 |
| Chr6:17672312-17677290 | 4979   | 4691                     | 3046.31                 |
| Chr6:19708606-19712027 | 3422   | 12696                    | 8244.72                 |

|                         |       |        |         |
|-------------------------|-------|--------|---------|
| Chr6:21224116-21229716  | 5601  | 7264   | 4717.21 |
| Chr6:23399231-23400693  | 1463  | 3208   | 2083.26 |
| Chr6:27797786-27809473  | 11688 | 86885  | 56422.7 |
| Chr6:28515401-28518631  | 3231  | 12851  | 8345.37 |
| Chr6:29376926-29380707  | 3782  | 72201  | 46887   |
| Chr7:994259-1002410     | 8152  | 16333  | 10606.6 |
| Chr7:3900402-3903667    | 3266  | 3445   | 2237.17 |
| Chr7:4345533-4353177    | 7645  | 91811  | 59621.6 |
| Chr7:4372338-4377228    | 4891  | 67854  | 44064   |
| Chr7:5719312-5723719    | 4408  | 3708   | 2407.96 |
| Chr7:8291249-8295114    | 3866  | 11836  | 7686.24 |
| Chr7:8295238-8301025    | 5788  | 52317  | 33974.4 |
| Chr7:12422204-12424303  | 2100  | 3166   | 2055.98 |
| Chr7:15676996-15677884  | 889   | 6300   | 4091.19 |
| Chr7:15677988-15679463  | 1476  | 5670   | 3682.07 |
| Chr7:15712019-15717810  | 5792  | 24475  | 15893.9 |
| Chr7:15986454-15991210  | 4757  | 45006  | 29226.7 |
| Chr7:19997588-20006845  | 9258  | 24983  | 16223.8 |
| Chr7:22459896-22462004  | 2109  | 4013   | 2606.02 |
| Chr7:23519922-23522314  | 2393  | 14805  | 9614.29 |
| Chr7:27168168-27170310  | 2143  | 8674   | 5632.85 |
| Chr8:5774450-5782021    | 7572  | 25294  | 16425.8 |
| Chr8:7662591-7666358    | 3768  | 4906   | 3185.93 |
| Chr8:7667566-7673911    | 6346  | 23564  | 15302.3 |
| Chr8:7762777-7770869    | 8093  | 76638  | 49768.3 |
| Chr8:7989698-7992785    | 3088  | 3899   | 2531.99 |
| Chr8:8446492-8449809    | 3318  | 3279   | 2129.37 |
| Chr8:9442326-9449307    | 6982  | 26946  | 17498.6 |
| Chr8:10491601-10502107  | 10507 | 76879  | 49924.8 |
| Chr8:15382219-15386505  | 4287  | 4929   | 3200.87 |
| Chr8:15452051-15462294  | 10244 | 193230 | 125483  |
| Chr8:15463930-15466939  | 3010  | 19090  | 12396.9 |
| Chr8:16972475-16979505  | 7031  | 31524  | 20471.5 |
| Chr8:20978460-20986722  | 8263  | 36753  | 23867.2 |
| Chr8:21691357-21695683  | 4327  | 25672  | 16671.3 |
| Chr8:27144219-27147533  | 3315  | 20172  | 13099.6 |
| Chr9:1285735-1297850    | 12116 | 16055  | 10426   |
| Chr9:3227842-3229695    | 1854  | 4320   | 2805.39 |
| Chr9:3229897-3231549    | 1653  | 4436   | 2880.72 |
| Chr9:3511863-3520039    | 8177  | 3616   | 2348.21 |
| Chr9:9556907-9558463    | 1557  | 5846   | 3796.36 |
| Chr9:12418728-12427379  | 8652  | 12860  | 8351.22 |
| Chr9:12621912-12624864  | 2953  | 9163   | 5950.41 |
| Chr9:15228033-15232300  | 4268  | 13083  | 8496.03 |
| Chr9:16723080-16727704  | 4625  | 86173  | 55960.3 |
| Chr10:402209-405187     | 2979  | 5792   | 3761.3  |
| Chr10:706457-709017     | 2561  | 15727  | 10213   |
| Chr10:3440841-3446759   | 5919  | 25840  | 16780.4 |
| Chr10:5923285-5934240   | 10956 | 111709 | 72543.3 |
| Chr10:15985582-15993013 | 7432  | 69318  | 45014.8 |
| Chr10:16003045-16005181 | 2137  | 19802  | 12859.3 |
| Chr10:16005548-16007059 | 1512  | 29905  | 19420.2 |
| Chr10:20760687-20764658 | 3972  | 6258   | 4063.91 |
| Chr10:20776680-20779739 | 3060  | 21513  | 13970.4 |
| Chr11:2540753-2545719   | 4967  | 19104  | 12406   |
| Chr11:3230045-3233566   | 3522  | 39640  | 25742   |
| Chr11:3993122-4001684   | 8563  | 3604   | 2340.42 |
| Chr11:7333501-7335924   | 2424  | 10522  | 6832.93 |
| Chr11:7720427-7725287   | 4861  | 4315   | 2802.14 |
| Chr11:7725464-7730825   | 5362  | 11047  | 7173.87 |
| Chr11:7731057-7735579   | 4523  | 98079  | 63692   |
| Chr11:7735681-7745404   | 9724  | 109025 | 70800.3 |
| Chr11:8909715-8916176   | 6462  | 13447  | 8732.41 |
| Chr11:16329832-16336817 | 6986  | 146548 | 95167.5 |
| Chr11:17164428-17170277 | 5850  | 26844  | 17432.4 |
| Chr11:19254414-19256359 | 1946  | 4080   | 2649.53 |
| Chr11:20706543-20709580 | 3038  | 27364  | 17770   |
| Chr11:21410967-21413825 | 2859  | 7780   | 5052.29 |
| Chr11:22338328-22343006 | 4679  | 8597   | 5582.85 |
| Chr11:24386677-24394635 | 7959  | 125353 | 81403.6 |
| Chr11:27016637-27019288 | 2652  | 16672  | 10826.7 |
| Chr12:4726888-4738498   | 11611 | 160135 | 103991  |
| Chr12:4898697-4904135   | 5439  | 52407  | 34032.8 |
| Chr12:4909460-4920376   | 10917 | 67759  | 44002.4 |
| Chr12:5022326-5028798   | 6473  | 20205  | 13121   |
| Chr12:9061812-9066482   | 4671  | 12399  | 8051.85 |
| Chr12:10926270-10929294 | 3025  | 4663   | 3028.13 |
| Chr12:17499957-17504299 | 4343  | 75202  | 48835.8 |
| Chr12:17505052-17508160 | 3109  | 3334   | 2165.08 |
| Chr12:17984443-17989007 | 4565  | 34540  | 22430.1 |
| Chr12:18391543-18392884 | 1342  | 6544   | 4249.64 |
| Chr12:18392996-18394312 | 1317  | 7551   | 4903.58 |
| Chr12:18394419-18397218 | 2800  | 8604   | 5587.39 |
| Chr12:18860401-18868300 | 7900  | 51691  | 33567.9 |
| Chr12:24725046-24735886 | 10841 | 167897 | 109031  |

**Table S2 Basic information of high-throughput sequencing.**

**mRNA-seq basic information**

| sample                           | raw reads   | raw bases      | clean reads | clean bases    | mapped reads | mapped ratio | depth (X) | SRA        | reference         |
|----------------------------------|-------------|----------------|-------------|----------------|--------------|--------------|-----------|------------|-------------------|
| TP309 seedling-R1                | 59,359,372  | 8,903,905,800  | 56,306,542  | 8,350,925,760  | 53,403,841   | 94.84%       | 22.39     |            |                   |
| TP309 seedling-R2                | 60,424,258  | 9,063,638,700  | 57,222,120  | 8,485,162,962  | 54,397,444   | 95.06%       | 22.75     |            |                   |
| TP309 seedling-R3                | 71,100,710  | 10,665,106,500 | 68,268,376  | 10,159,956,972 | 64,941,139   | 95.13%       | 27.24     |            |                   |
| TP309 inflorescence-R1           | 67,537,852  | 10,130,677,800 | 65,650,002  | 9,807,815,124  | 62,067,623   | 94.54%       | 26.29     |            |                   |
| TP309 inflorescence-R2           | 70,342,390  | 10,551,358,500 | 68,459,800  | 10,228,000,942 | 64,711,656   | 94.53%       | 27.42     |            |                   |
| Nip inflorescence-R1             | 69,906,792  | 10,486,018,800 | 63,796,400  | 9,332,604,980  | 60,771,007   | 95.26%       | 25.02     | SRX3837322 | Wang et al., 2022 |
| Nip inflorescence-R2             | 67,044,098  | 10,056,614,700 | 60,326,862  | 8,813,623,755  | 57,151,392   | 94.74%       | 23.63     | SRX3837323 | Wang et al., 2022 |
| <i>osrd2-3</i> -inflorescence-R1 | 69,885,574  | 10,482,836,100 | 65,013,666  | 9,648,288,625  | 60,313,287   | 92.77%       | 25.87     | SRX3837325 | Wang et al., 2022 |
| <i>osrd2-3</i> -inflorescence-R2 | 67,544,644  | 10,131,696,600 | 59,756,218  | 8,724,920,377  | 55,205,212   | 92.38%       | 23.39     | SRX3837326 | Wang et al., 2022 |
| Nip seedling-R1                  | 274,272,624 | 41,140,893,600 | 251,471,788 | 37,210,950,150 | 237,216,298  | 94.33%       | 99.76     | SRX5724238 | Wang et al., 2022 |
| Nip seedling-R2                  | 125,356,904 | 18,803,535,600 | 115,313,972 | 17,036,610,626 | 110,542,360  | 95.86%       | 45.67     | SRX5724239 | Wang et al., 2022 |
| Nip stamen-R1                    | 79,193,822  | 11,879,073,300 | 76,682,404  | 11,445,718,761 | 73,313,209   | 95.61%       | 30.69     | SRX8512913 | Wang et al., 2022 |
| Nip stamen-R2                    | 84,400,444  | 12,660,066,600 | 81,429,974  | 12,151,494,381 | 77,489,483   | 95.16%       | 32.58     | SRX8512914 | Wang et al., 2022 |
| Nip stamen-R3                    | 88,647,982  | 13,297,197,300 | 85,699,916  | 12,790,464,730 | 81,727,019   | 95.36%       | 34.29     | SRX8512915 | Wang et al., 2022 |
| <i>osrd2-3</i> stamen-R1         | 78,100,906  | 11,715,135,900 | 75,756,582  | 11,313,273,498 | 72,599,932   | 95.83%       | 30.33     | SRX8512916 | Wang et al., 2022 |
| <i>osrd2-3</i> stamen-R2         | 94,160,166  | 14,124,024,900 | 91,096,730  | 13,600,442,830 | 86,939,598   | 95.44%       | 36.46     | SRX8512917 | Wang et al., 2022 |
| <i>osrd2-3</i> stamen-R3         | 84,001,516  | 12,600,227,400 | 81,080,748  | 12,101,849,943 | 77,181,083   | 95.19%       | 32.44     | SRX8512918 | Wang et al., 2022 |
| Nip pistil-R1                    | 67,864,086  | 10,179,612,900 | 65,739,068  | 9,813,460,640  | 63,080,665   | 95.96%       | 26.31     | SRX8512922 | Wang et al., 2022 |
| Nip pistil-R2                    | 85,546,240  | 12,831,936,000 | 82,628,330  | 12,333,614,112 | 78,932,663   | 95.53%       | 33.07     | SRX8512923 | Wang et al., 2022 |
| Nip pistil-R3                    | 82,711,026  | 12,406,653,900 | 79,988,436  | 11,941,312,616 | 76,239,247   | 95.31%       | 32.01     | SRX8512924 | Wang et al., 2022 |
| <i>osrd2-3</i> pistil-R1         | 60,308,434  | 9,046,265,100  | 58,377,330  | 8,716,684,070  | 56,081,979   | 96.07%       | 23.37     | SRX8512925 | Wang et al., 2022 |
| <i>osrd2-3</i> pistil-R2         | 76,990,078  | 11,548,511,700 | 74,266,718  | 11,087,236,958 | 71,126,258   | 95.77%       | 29.72     | SRX8512926 | Wang et al., 2022 |
| <i>osrd2-3</i> pistil-R3         | 71,775,126  | 10,766,268,900 | 69,145,974  | 10,324,886,034 | 65,985,379   | 95.43%       | 27.68     | SRX8512927 | Wang et al., 2022 |

**sRNA-seq basic information**

| sample                        | raw reads   | clean reads | mapped reads | mapped ratio | SRA         | reference             |
|-------------------------------|-------------|-------------|--------------|--------------|-------------|-----------------------|
| Nip bract                     | 19,988,796  | 19,969,562  | 15,691,409   | 78.58%       |             |                       |
| Nip branch                    | 21,506,629  | 21,496,916  | 18,451,096   | 85.83%       |             |                       |
| TP309 seedling-R1             | 28,321,200  | 28,311,900  | 22,542,144   | 79.62%       | SRX11502899 | Wang et al., 2022     |
| TP309 seedling-R2             | 27,980,509  | 27,965,218  | 21,968,483   | 78.56%       | SRX11502900 | Wang et al., 2022     |
| TP309 inflorescence-R1        | 20,740,453  | 20,739,517  | 16,952,014   | 81.74%       |             |                       |
| TP309 inflorescence-R2        | 28,674,331  | 28,674,085  | 19,137,666   | 66.74%       |             |                       |
| TP309 seed coat               | 24,149,326  | 24,149,325  | 20,975,097   | 86.86%       |             |                       |
| <i>fem 1-1</i> seed coat      | 21,981,245  | 21,981,243  | 18,383,150   | 83.63%       |             |                       |
| <i>pol iv</i> seed coat       | 21,382,456  | 21,382,453  | 16,669,784   | 77.96%       |             |                       |
| TP309 endosperm               | 22,388,240  | 22,388,240  | 18,459,636   | 82.45%       |             |                       |
| <i>fem 1-1</i> endosperm      | 21,483,482  | 21,483,481  | 18,128,932   | 84.39%       |             |                       |
| <i>pol iv</i> endosperm       | 22,421,276  | 22,421,275  | 17,743,305   | 79.14%       |             |                       |
| Nip inflorescence-R1          | 25,030,595  | 25,030,251  | 16,847,503   | 67.31%       | SRX3837382  | Wang et al., 2022     |
| Nip inflorescence-R2          | 27,227,675  | 27,227,004  | 23,102,469   | 84.85%       | SRX5724233  | Wang et al., 2022     |
| <i>osrd2-3</i> inflorescence  | 23,490,085  | 23,489,603  | 14,365,213   | 61.16%       | SRX3837383  | Wang et al., 2022     |
| <i>osrd2-6</i> inflorescence  | 27,978,716  | 27,977,683  | 19,715,066   | 70.47%       | SRX5724234  | Wang et al., 2022     |
| seedling-R1                   | 24,875,329  | 24,875,202  | 21,678,829   | 87.15%       | SRX5724235  | Wang et al., 2022     |
| seedling-R2                   | 25,131,542  | 25,131,495  | 21,913,601   | 87.20%       | SRX5724236  | Wang et al., 2022     |
| <i>osrd2-6</i> seedling       | 24,737,577  | 24,737,425  | 19,747,442   | 79.83%       | SRX5724237  | Wang et al., 2022     |
| Nip stamen                    | 21,045,563  | 21,038,047  | 16,305,153   | 77.50%       | SRX8512935  | Wang et al., 2022     |
| <i>osrd2-3</i> stamen         | 24,307,925  | 24,307,719  | 20,474,882   | 84.23%       | SRX8512936  | Wang et al., 2022     |
| <i>osrd2-6</i> stamen         | 25,967,101  | 25,966,752  | 21,961,584   | 84.58%       | SRX8512937  | Wang et al., 2022     |
| Nip pistil                    | 19,986,635  | 19,985,410  | 17,356,918   | 86.85%       | SRX8512938  | Wang et al., 2022     |
| <i>osrd2-3</i> pistil         | 26,506,662  | 26,504,142  | 21,282,404   | 80.30%       | SRX8512939  | Wang et al., 2022     |
| <i>osrd2-6</i> pistil         | 26,048,327  | 26,048,255  | 22,596,967   | 86.75%       | SRX8512940  | Wang et al., 2022     |
| egg cell-R1                   | 34,338,087  | 17,949,255  | 13,431,907   | 74.83%       | SRX5757720  | Li et al., 2020       |
| egg cell-R2                   | 36,755,974  | 21,298,630  | 15,828,862   | 89.91%       | SRX5757723  | Li et al., 2020       |
| ovary without the egg cell-R1 | 40,408,939  | 30,862,239  | 27,747,170   | 77.50%       | SRX5757668  | Li et al., 2020       |
| ovary without the egg cell-R2 | 42,307,958  | 32,635,862  | 29,331,685   | 79.10%       | SRX5757691  | Li et al., 2020       |
| sperm-R1                      | 52,745,236  | 32,007,855  | 24,806,059   | 74.32%       | SRX5757716  | Li et al., 2020       |
| sperm-R2                      | 60,979,419  | 37,833,278  | 29,345,251   | 89.88%       | SRX5757717  | Li et al., 2020       |
| vegetative cell-R1            | 118,005,472 | 41,020,785  | 32,447,006   | 77.56%       | SRX5757653  | Li et al., 2020       |
| vegetative cell-R2            | 86,675,388  | 34,093,634  | 26,449,728   | 77.58%       | SRX5757654  | Li et al., 2020       |
| embryo                        | 26,233,129  | 24,712,273  | 20,608,555   | 83.39%       | SRX248516   | Rodrigues et al. 2013 |
| endosperm                     | 22,605,850  | 19,253,861  | 16,030,242   | 83.26%       | SRX248515   | Rodrigues et al. 2013 |

**Basic information of bisulfite sequencing data.**

| sample                       | raw reads   | raw bases      | clean reads | clean bases    | mapped reads | mapped ratio | coverage | depth (X) | conversion rate | SRA        | reference         |
|------------------------------|-------------|----------------|-------------|----------------|--------------|--------------|----------|-----------|-----------------|------------|-------------------|
| Nip inflorescence-R1         | 157,087,444 | 15,708,744,400 | 148,033,072 | 14,803,307,200 | 102,959,700  | 69.6%        | 93.54%   | 22.79     | 99.55%          | SRX3837328 | Wang et al., 2022 |
| Nip inflorescence-R2         | 168,633,068 | 25,294,960,200 | 161,320,954 | 24,198,143,100 | 106,198,762  | 65.8%        | 94.18%   | 28.10     | 99.58%          | SRX5724228 | Wang et al., 2022 |
| <i>osrd2-3</i> inflorescence | 159,396,562 | 15,939,656,200 | 151,230,624 | 15,123,062,400 | 103,639,178  | 68.5%        | 93.96%   | 23.10     | 99.62%          | SRX3837329 | Wang et al., 2022 |
| <i>osrd2-6</i> inflorescence | 140,415,006 | 21,062,250,900 | 134,758,396 | 20,213,759,400 | 83,582,372   | 62.0%        | 92.86%   | 21.93     | 99.44%          | SRX5724229 | Wang et al., 2022 |
| Nip seedling-R1              | 227,476,972 | 34,121,545,800 | 218,857,910 | 32,828,686,500 | 168,637,380  | 77.1%        | 94.59%   | 35.33     | 99.53%          | SRX5724230 | Wang et al., 2022 |
| Nip seedling-R2              | 178,621,232 | 26,793,184,800 | 171,791,384 | 25,768,707,600 | 132,069,884  | 76.9%        | 94.05%   | 29.42     | 99.51%          | SRX5724231 | Wang et al., 2022 |
| <i>osrd2-6</i> seedling      | 243,416,222 | 36,512,433,300 | 234,162,858 | 35,124,428,700 | 182,309,254  | 77.9%        | 94.70%   | 39.09     | 99.55%          | SRX5724232 | Wang et al., 2022 |
| Nip stamen                   | 135,381,864 | 20,307,279,600 | 135,381,806 | 20,307,270,900 | 109,532,276  | 80.9%        | 94.02%   | 25.52     | 99.46%          | SRX8512907 | Wang et al., 2022 |
| <i>osrd2-3</i> stamen        | 134,734,552 | 20,210,182,800 | 134,734,156 | 20,210,123,400 | 99,740,148   | 74.0%        | 94.24%   | 26.94     | 99.54%          | SRX8512908 | Wang et al., 2022 |
| <i>osrd2-6</i> stamen        | 135,399,670 | 20,309,950,500 | 135,399,612 | 20,309,941,800 | 106,647,162  | 78.8%        | 93.83%   | 25.09     | 99.49%          | SRX8512909 | Wang et al., 2022 |
| Nip pistil                   | 134,834,618 | 20,225,192,700 | 134,834,560 | 20,225,184,000 | 106,989,728  | 79.3%        | 93.79%   | 24.71     | 99.42%          | SRX8512910 | Wang et al., 2022 |
| <i>osrd2-3</i> pistil        | 135,111,284 | 20,266,692,600 | 135,111,240 | 20,266,686,000 | 107,675,592  | 79.7%        | 93.74%   | 25.36     | 99.45%          | SRX8512911 | Wang et al., 2022 |
| <i>osrd2-6</i> pistil        | 135,271,462 | 20,290,719,300 | 135,271,390 | 20,290,708,500 | 104,106,846  | 77.0%        | 93.69%   | 23.59     | 99.46%          | SRX8512912 | Wang et al., 2022 |
| endosperm                    | 72,549,332  | 10,882,399,800 | 63,416,348  | 9,512,452,200  | 51,983,520   | 82.0%        | 82.46%   | 12.98     | 99.49%          | SRX4396080 | Liu et al., 2018  |

**Basic information of ChIP-seq data**

| sample                       | raw reads  | clean reads | mapped reads | mapped ratio | SRA        | reference           |
|------------------------------|------------|-------------|--------------|--------------|------------|---------------------|
| young inflorescence H3K9me2  | 36,040,908 | 33,849,332  | 33,728,693   | 99.64%       | SRX7426653 | Zhao et al., 2020   |
| young inflorescence H3K27me3 | 31,084,746 | 28,068,766  | 27,277,132   | 97.18%       | SRX7426649 | Zhao et al., 2020   |
| young inflorescence H3K4me1  | 21,003,844 | 18,872,928  | 17,328,304   | 91.82%       | SRX7426651 | Zhao et al., 2020   |
| young inflorescence H3K4me3  | 17,702,958 | 15,326,724  | 15,118,170   | 98.64%       | SRX7426645 | Zhao et al., 2020   |
| young inflorescence H3K27ac  | 19,577,316 | 16,782,264  | 16,505,881   | 98.35%       | SRX7426647 | Zhao et al., 2020   |
| young inflorescence Pol II   | 18,681,528 | 16,208,338  | 15,708,263   | 96.91%       | SRX7426655 | Zhao et al., 2020   |
| endosperm H3K27me3           | 10,999,930 | 10,925,764  | 7,287,778    | 66.70%       | SRX040548  | Malone et al., 2011 |

**Table S3 Primers list.**

| Name      | Sequence(5'-3')          | Experiment                                             |
|-----------|--------------------------|--------------------------------------------------------|
| BILL-F    | GATGGAGAGAGTATTGTGTAC    | sRNA northern blotting (Corresponding to Figure 4F)    |
| BILL-R    | GTCTCTCTAGCAGCGTAAAGC    | sRNA northern blotting (Corresponding to Figure 4F)    |
| methyl1-F | CATTTTGCTTCCTGCATTCCTC   | Chop-PCR (Corresponding to Figure 3D the first locus)  |
| methyl1-R | CTGGCGTGCAACCGCACAAACATG | Chop-PCR (Corresponding to Figure 3D the first locus)  |
| methyl2-F | GATGGAGAGAGTATTGTGTAC    | Chop-PCR (Corresponding to Figure 3D the second locus) |
| methyl2-R | GTCTCTCTAGCAGCGTAAAGC    | Chop-PCR (Corresponding to Figure 3D the second locus) |
